# Supplementary material
Source: publisher figshare collection journal article supplement (https://acs.figshare.com/ndownloader/files/27491699)
Supplement: Supplementary file 1 [file 27491699]

## Sheet: HR XANES_Spectra
Grebe_brain	Grebe_brain	Grebe_muscle	Grebe_muscle	Grebe_kidneys	Grebe_kidneys	Grebe_liver	Grebe_liver	Grebe_breast_feather	Grebe_breast_feather	Tern_brain	Tern_brain	Tern_muscle	Tern_muscle	Tern_kidneys	Tern_kidneys	Tern_liver	Tern_liver	Tern_breast_feather	Tern_breast_feather	Skua_muscle	Skua_muscle	Skua_liver	Skua_liver	Hg(Sec)4_ITFA	Hg(Sec)4_ITFA	Hg(GSH)2_pH7.4	Hg(GSH)2_pH7.4
energy_ev	norm_absorb	energy_ev	norm_absorb	energy_ev	norm_absorb	energy_ev	norm_absorb	energy_ev	norm_absorb	energy_ev	norm_absorb	energy_ev	norm_absorb	energy_ev	norm_absorb	energy_ev	norm_absorb	energy_ev	norm_absorb	energy_ev	norm_absorb	energy_ev	norm_absorb	energy_ev	norm_absorb	energy_ev	norm_absorb
12259.5	0.00103531	12259.1	0.00152377	12259.1	0.00388578	12259.1	0.00138956	12259.1	0.00181146	12270.8	0.00344756	12259.1	0.000573313	12259	0.00523185	12259	0.00261794	12259.1	0.00273096	12259.1	0.00954167	12259	0.00158236	12260.1	0.000511054	12259.5	0.00129252
12259.7	0.00138044	12259.3	0.00145061	12259.3	0.00297005	12259.3	0.00168204	12259.3	0.00227639	12271	0.00405855	12259.3	0.000151449	12259	0.00504888	12259.2	0.00378898	12259.3	0.00171431	12259.1	0.00954585	12259.1	0.00184824	12260.2	0.00180609	12259.7	1.54122e-05
12259.9	0.001097	12259.5	0.00133987	12259.5	0.00170173	12259.5	0.00199676	12259.5	0.00169928	12271.2	0.00511763	12259.5	0.000929541	12259.1	0.00469346	12259.4	0.00243292	12259.5	0.00164504	12259.1	0.00840317	12259.2	0.00285527	12260.5	0.000343591	12259.9	0.000950122
12260.1	0.000452015	12259.7	0.00117495	12259.7	0.00163962	12259.7	0.00202173	12259.7	0.00145181	12271.4	0.00488475	12259.7	0.0011964	12259.2	0.00496492	12259.6	0.00271012	12259.7	0.00341628	12259.3	0.0126683	12259.5	0.00153264	12260.7	0.00118201	12260.1	0.00170221
12260.3	0.000243955	12259.9	0.000680445	12259.9	0.000988177	12259.9	0.00198687	12259.9	0.00253612	12271.6	0.00425321	12259.9	0.00106021	12259.4	0.00790478	12259.8	0.00321345	12259.8	0.00211789	12259.5	0.0102203	12259.7	0.00077746	12260.9	0.00237295	12260.3	0.000894091
12260.5	0.000469452	12260.1	0.00108759	12260.1	0.00140394	12260.1	0.000941294	12260.1	0.00158794	12271.9	0.00513804	12260.1	0.000743524	12259.6	0.00574254	12260	0.00501898	12260	0.00149316	12259.7	0.0075923	12259.8	0.00145998	12261.1	0.00304516	12260.5	0.000848074
12260.7	0.000614266	12260.3	0.00210813	12260.3	0.00131152	12260.3	0.00121608	12260.3	0.00215176	12272.1	0.00509767	12260.3	0.000338024	12259.8	0.00407266	12260.2	0.00493473	12260.3	0.00192938	12259.9	0.0102474	12260	0.00203157	12261.3	0.00122201	12260.7	0.000507075
12260.9	5.0806e-06	12260.5	0.000739685	12260.5	0.00190221	12260.5	0.00159916	12260.5	0.00258107	12272.2	0.00599266	12260.5	0.000689837	12260	0.00541876	12260.4	0.00347563	12260.5	0.000171305	12260	0.00732398	12260.2	0.000769104	12261.5	0.00190791	12261	0.00126027
12261.1	0.0008415	12260.7	0.00143546	12260.7	0.00378004	12260.7	0.00176593	12260.7	0.00168899	12272.5	0.00728072	12260.7	0.000613748	12260.2	0.00470439	12260.6	0.00326565	12260.7	0.0027944	12260.2	0.00880382	12260.4	0.000954135	12261.6	0.00101035	12261.2	0.000777302
12261.3	0.00118093	12260.9	0.00107026	12260.9	0.00282061	12260.9	0.00177639	12260.9	0.00174405	12272.7	0.00750147	12260.9	0.000747492	12260.4	0.00472892	12260.8	0.00227288	12260.9	0.00114335	12260.5	0.00752939	12260.6	0.000579756	12261.9	0.00344665	12261.4	0.00091069
12261.5	0.00140705	12261.1	0.00139672	12261.1	0.00149986	12261.1	0.00103963	12261.1	0.0020185	12272.9	0.007135	12261.1	0.000924389	12260.6	0.00656133	12261	0.00437217	12261	0.00449863	12260.7	0.00746417	12260.8	0.00186797	12262.1	0.000585467	12261.6	0.000857936
12261.6	0.000900588	12261.3	0.000944728	12261.3	0.00269105	12261.3	0.00162142	12261.3	0.000522006	12273	0.00864276	12261.3	0.000407004	12260.8	0.00446241	12261.2	0.00181013	12261.2	0.00294661	12260.9	0.00854201	12261	0.00295079	12262.3	0.00251429	12261.8	0.00067936
12261.9	0.000405007	12261.5	0.00170668	12261.5	0.00314582	12261.5	0.00091956	12261.5	0.00143307	12273.3	0.00929422	12261.5	0.000302615	12261	0.00406161	12261.4	0.00599553	12261.4	0.000822319	12261.1	0.0137009	12261.2	0.00185002	12262.5	0.00330407	12262	0.000595569
12262.1	0.000354564	12261.6	0.00173097	12261.6	0.00282273	12261.6	0.00105705	12261.6	0.00116488	12273.5	0.0106746	12261.7	0.000788872	12261.2	0.00230838	12261.6	0.00453714	12261.6	0.00275869	12261.3	0.0110186	12261.4	0.00210152	12262.7	0.00151693	12262.1	0.000614018
12262.3	0.00151726	12261.9	0.00138812	12261.9	0.00303441	12261.9	0.00136215	12261.9	0.00100112	12273.7	0.0117883	12261.9	0.00125913	12261.4	0.00624705	12261.8	0.00522257	12261.8	0.00253618	12261.4	0.0124159	12261.6	0.00158944	12262.9	0.0028505	12262.4	0.000328452
12262.5	0.000523328	12262.1	0.00102301	12262.1	0.00355802	12262.1	0.0014391	12262.1	0.00192447	12273.9	0.0137329	12262.1	0.00116657	12261.6	0.00599216	12262	0.0044155	12262	0.00264686	12261.6	0.00979776	12261.8	0.00286222	12263	0.00231319	12262.6	0.000719932
12262.7	0.000407629	12262.3	0.000921273	12262.3	0.00251072	12262.3	0.00204625	12262.3	0.00286655	12274.1	0.0143688	12262.3	0.00102001	12261.8	0.00407035	12262.2	0.00302395	12262.2	0.00171278	12261.8	0.00768583	12262	0.00153169	12263.2	0.00189138	12262.8	0.0013735
12262.9	0.000282706	12262.5	0.00137436	12262.5	0.0033189	12262.5	0.00151398	12262.5	0.00217008	12274.3	0.016563	12262.5	0.000524026	12262	0.00436953	12262.4	0.00527899	12262.5	0.00294295	12262.1	0.0113627	12262.2	0.00173585	12263.4	0.00110372	12263	0.00100303
12263.1	0.000849186	12262.7	0.00201667	12262.7	0.00287891	12262.7	0.00110561	12262.7	0.0018014	12274.5	0.0178513	12262.7	0.000759412	12262.2	0.00645413	12262.6	0.00642668	12262.6	0.00134231	12262.3	-0.000133479	12262.4	0.00114329	12263.6	-0.000164567	12263.2	0.00103232
12263.2	0.00127073	12262.9	0.00107886	12262.9	0.00224969	12262.9	0.00147745	12262.9	0.0015183	12274.7	0.0213987	12262.9	0.000111335	12262.5	0.00650766	12262.8	0.00388466	12262.8	0.000710274	12262.5	0.00701471	12262.6	9.29894e-05	12263.8	0.00266001	12263.4	0.000923908
12263.4	0.000556662	12263.1	0.00100089	12263.1	0.00402322	12263.1	0.00143286	12263.1	0.00258148	12274.9	0.0241643	12263.1	0.000790696	12262.6	0.00567887	12263	0.00469251	12263	0.0010636	12262.7	0.0084546	12262.8	0.00215433	12264	0.00228908	12263.6	0.00025835
12263.6	7.2237e-06	12263.2	0.000872733	12263.2	0.0030888	12263.2	0.00147697	12263.2	0.00249278	12275.1	0.0279296	12263.3	0.00137006	12262.8	0.00564931	12263.2	0.00300792	12263.2	0.003033	12262.9	0.0103441	12263	0.000954285	12264.2	0.000417171	12263.8	0.000391402
12263.8	0.00155306	12263.4	0.00133337	12263.4	0.00363301	12263.4	0.00132416	12263.4	0.001676	12275.3	0.0332689	12263.5	0.00088006	12263	0.00594008	12263.4	0.00322132	12263.4	0.00316744	12263.1	0.00497254	12263.2	0.00148275	12264.4	0.00128564	12264	0.00103677
12264	0.00192472	12263.6	0.000311012	12263.6	0.00330883	12263.6	0.00146252	12263.6	0.00146098	12275.5	0.0381733	12263.7	0.000754364	12263.2	0.00568901	12263.5	0.00216213	12263.6	0.00245896	12263.2	0.00646322	12263.4	0.000901156	12264.5	0.00206352	12264.2	0.000176169
12264.2	0.000542956	12263.8	0.00167885	12263.8	0.00405702	12263.8	0.0011446	12263.8	0.00282886	12275.7	0.0456912	12263.8	0.000570469	12263.4	0.00505383	12263.8	0.00374564	12263.8	0.00223418	12263.4	0.00886722	12263.6	0.00201144	12264.7	0.00284454	12264.4	0.000625634
12264.4	0.000394719	12264	0.000929611	12264	0.0025339	12264	0.00158796	12264	0.000940171	12275.9	0.0528501	12264	0.00119173	12263.5	0.00680373	12264	0.00310838	12264	0.00390975	12263.6	0.00733519	12263.8	0.00318834	12264.9	0.0023091	12264.6	0.000860208
12264.6	-0.000115929	12264.2	0.001128	12264.2	0.00154087	12264.2	0.00165028	12264.2	0.000218847	12276.1	0.0629544	12264.2	0.00130726	12263.8	0.00380789	12264.1	0.001814	12264.2	0.00291635	12263.8	0.00866693	12264	0.00182375	12265.1	0.000667499	12264.8	0.000875316
12264.7	8.93059e-05	12264.4	0.0017291	12264.4	0.00219085	12264.4	0.00145077	12264.4	0.00163354	12276.3	0.0738819	12264.4	0.000682042	12264	0.00495701	12264.3	0.0031689	12264.4	0.00433441	12264	0.0103191	12264.2	0.00211069	12265.3	0.00194016	12265	0.000878521
12264.9	0.000996928	12264.6	0.00157152	12264.6	0.00309326	12264.6	0.00222179	12264.6	0.00223176	12276.5	0.0889423	12264.6	0.000710803	12264.1	0.00543409	12264.5	0.00397597	12264.5	0.00218442	12264.2	0.00923968	12264.4	0.00280172	12265.5	0.00279747	12265.1	0.000464191
12265.1	0.000367634	12264.7	0.00130753	12264.7	0.0039803	12264.7	0.00175929	12264.7	0.00313124	12276.7	0.108661	12264.8	0.00173573	12264.3	0.00496598	12264.7	0.00394699	12264.7	0.00320138	12264.4	0.01037	12264.5	0.00160865	12265.7	0.00170321	12265.3	0.000611195
12265.3	-0.000179359	12264.9	0.00223614	12264.9	0.00174845	12264.9	0.00246117	12264.9	0.00306006	12276.9	0.132288	12265	0.000837258	12264.5	0.00467294	12264.9	0.00468829	12264.9	0.00366673	12264.5	0.011414	12264.7	0.0022663	12265.9	0.000593979	12265.5	0.000176791
12265.5	-0.00052747	12265.1	0.00160604	12265.1	0.00211701	12265.1	0.00117208	12265.1	0.00203486	12277.1	0.162832	12265.1	0.00100699	12264.7	0.00477938	12265	0.00430869	12265.1	0.00412809	12264.7	0.00454549	12264.9	0.000631046	12266.1	0.000687903	12265.7	0.000817747
12265.7	0.000539584	12265.3	0.001576	12265.3	0.00403301	12265.3	0.00102151	12265.3	0.00209303	12277.3	0.195674	12265.3	0.00111341	12264.9	0.00256676	12265.2	0.00367652	12265.3	0.00276264	12264.9	0.00566684	12265.1	0.000988893	12266.3	0.0020183	12265.9	0.000944357
12265.9	2.01564e-05	12265.5	0.0013255	12265.5	0.00320111	12265.5	0.00115442	12265.5	0.00248927	12277.5	0.232822	12265.5	0.00169431	12265.1	0.00667511	12265.4	0.000516909	12265.5	0.00258804	12265.1	0.00867542	12265.3	0.00139888	12266.5	0.0024875	12266.1	0.001387
12266.1	-0.000107203	12265.7	0.00149477	12265.7	0.00413229	12265.7	0.00209892	12265.7	0.00297249	12277.6	0.277856	12265.7	0.0016372	12265.2	0.00536709	12265.6	0.00158116	12265.6	0.0032489	12265.3	0.0129496	12265.5	0.00314877	12266.6	0.00245041	12266.3	0.00148927
12266.3	0.000390788	12265.9	0.00133879	12265.9	0.00387888	12265.9	0.00253293	12265.9	0.00175449	12277.8	0.327905	12265.9	0.000831406	12265.5	0.00367098	12265.8	0.00428641	12265.8	0.00330508	12265.5	0.0132494	12265.6	0.00180003	12266.9	0.000885933	12266.4	0.000811951
12266.5	0.000577424	12266.1	0.00168551	12266.1	0.0032396	12266.1	0.00185313	12266.1	0.00260908	12278	0.388232	12266.1	0.00102109	12265.6	0.00306836	12266	0.00161866	12266	0.00271494	12265.7	0.0096921	12265.8	0.00177618	12267.1	0.00225524	12266.6	0.000818273
12266.7	0.00119224	12266.3	0.00162433	12266.3	0.00324403	12266.3	0.00232672	12266.3	0.00169615	12278.2	0.448614	12266.3	0.000694944	12265.8	0.0051728	12266.2	0.00478736	12266.2	0.00214977	12265.9	0.0050914	12266	0.00252924	12267.3	0.00205338	12266.8	0.000564628
12266.9	0.00150383	12266.5	0.00211284	12266.5	0.00274641	12266.5	0.00212386	12266.5	0.00259557	12278.4	0.525686	12266.5	0.000858097	12266	0.00398526	12266.4	0.00231569	12266.4	0.00297222	12266.1	0.00841391	12266.2	0.00182259	12267.5	0.000724382	12267	0.000486123
12267.1	0.00159992	12266.7	0.00186042	12266.7	0.00339519	12266.7	0.00168875	12266.7	0.0023144	12278.6	0.591636	12266.7	0.00128098	12266.2	0.00598066	12266.6	0.00191959	12266.6	0.00416531	12266.2	0.0126486	12266.4	0.00162504	12267.6	0.000269784	12267.2	0.00107529
12267.3	0.000969406	12266.9	0.00216022	12266.9	0.00402741	12266.9	0.00187772	12266.9	0.00310781	12278.8	0.659468	12266.9	0.000746115	12266.4	0.00600727	12266.8	0.0019633	12266.8	0.00418302	12266.5	0.00976292	12266.6	0.00257892	12267.8	0.000985393	12267.4	0.00110343
12267.5	0.00121697	12267.1	0.00135824	12267.1	0.00347142	12267.1	0.00180432	12267.1	0.00319993	12279	0.711793	12267.1	0.000550464	12266.6	0.00653366	12267	0.00325975	12267	0.0047667	12266.6	0.00827416	12266.8	0.00266528	12268	0.000526512	12267.6	0.000773093
12267.7	0.00197193	12267.3	0.00093575	12267.3	0.00340493	12267.3	0.00211579	12267.3	0.00273529	12279.2	0.761804	12267.3	0.00128861	12266.8	0.00931984	12267.2	0.00377311	12267.2	0.00322173	12266.9	0.0106971	12267	0.00169279	12268.2	-0.000133113	12267.8	0.00115639
12267.8	0.00206246	12267.5	0.00193251	12267.5	0.0038076	12267.5	0.00275868	12267.5	0.00300924	12279.4	0.79945	12267.5	0.00223374	12267	0.00556358	12267.4	0.00467545	12267.4	0.0044206	12267.1	0.0113521	12267.2	0.00170963	12268.4	0.000761158	12268	0.00164126
12268	0.00137326	12267.7	0.00158922	12267.7	0.00423963	12267.7	0.00259785	12267.7	0.00309688	12279.5	0.822751	12267.7	0.00172383	12267.2	0.00583236	12267.6	0.00460169	12267.6	0.00308033	12267.2	0.00639083	12267.4	0.00179081	12268.6	0.00232048	12268.1	0.00204827
12268.2	0.00116733	12267.8	0.00187875	12267.8	0.00480551	12267.8	0.00192907	12267.8	0.00202783	12279.7	0.835436	12267.9	0.00210835	12267.4	0.00797635	12267.8	0.0049906	12267.8	0.00392647	12267.5	0.00782934	12267.6	0.00220701	12268.8	0.00338466	12268.3	0.000996458
12268.4	0.00138307	12268	0.00231693	12268	0.00321958	12268	0.00163428	12268	0.0022337	12279.9	0.833908	12268	0.0021229	12267.6	0.00579587	12268	0.00707294	12268	0.00379229	12267.6	0.0109315	12267.8	0.00297996	12269	0.00266886	12268.5	0.00105763
12268.6	0.00147782	12268.2	0.00174465	12268.2	0.00353234	12268.2	0.00210992	12268.2	0.00264867	12280.1	0.823348	12268.2	0.00162804	12267.8	0.00506845	12268.2	0.00533786	12268.2	0.00522337	12267.8	0.00845278	12268	0.00026271	12269.2	0.00187686	12268.7	0.00181516
12268.8	0.00143902	12268.4	0.00191773	12268.4	0.00387404	12268.4	0.00213131	12268.4	0.0027554	12280.3	0.805855	12268.5	0.00177619	12268	0.00840566	12268.4	0.00419833	12268.4	0.00600889	12268	0.0100931	12268.2	0.00224572	12269.4	0.00203507	12268.9	0.0010055
12269	0.00117202	12268.6	0.0021732	12268.6	0.00398862	12268.6	0.00245048	12268.6	0.00293457	12280.5	0.778105	12268.7	0.00147043	12268.2	0.00789565	12268.6	0.00546889	12268.6	0.00311506	12268.2	0.0100369	12268.4	0.00293244	12269.6	0.00253797	12269.1	0.00186501
12269.2	0.000888266	12268.8	0.00269067	12268.8	0.00424904	12268.8	0.00294055	12268.8	0.00332008	12280.7	0.743903	12268.9	0.00187226	12268.4	0.00803589	12268.8	0.005732	12268.8	0.00328301	12268.4	0.00598461	12268.6	0.0027586	12269.8	0.00254647	12269.3	0.00204411
12269.4	0.00155536	12269	0.00208535	12269	0.00429396	12269	0.00266502	12269	0.00318265	12280.9	0.709013	12269.1	0.000986742	12268.6	0.00655554	12269	0.00543923	12269	0.00517327	12268.6	0.0094682	12268.8	0.00312178	12270	0.00253097	12269.5	0.00179552
12269.6	0.0011372	12269.2	0.00237673	12269.2	0.0045745	12269.2	0.0028293	12269.2	0.0030803	12281.1	0.67426	12269.2	0.00202853	12268.8	0.00598565	12269.1	0.00754355	12269.2	0.00517577	12268.8	0.00121848	12269	0.0036552	12270.2	0.00409286	12269.6	0.00254639
12269.8	0.000755671	12269.4	0.00272179	12269.4	0.00490354	12269.4	0.002861	12269.4	0.00314285	12281.3	0.641453	12269.4	0.00220667	12269	0.00758448	12269.3	0.00532897	12269.3	0.00375145	12269	0.0097632	12269.2	0.00358833	12270.5	0.00311949	12269.8	0.00208264
12270	0.00128371	12269.6	0.00216574	12269.6	0.00548513	12269.6	0.00356048	12269.6	0.00365255	12281.5	0.609834	12269.6	0.00186573	12269.2	0.00630194	12269.5	0.00791799	12269.5	0.00419616	12269.2	0.0097054	12269.4	0.00239718	12270.7	0.00424818	12270	0.00220293
12270.2	0.00168998	12269.8	0.00225153	12269.8	0.00587685	12269.8	0.00297888	12269.8	0.00328838	12281.7	0.582886	12269.8	0.00228823	12269.4	0.00505512	12269.7	0.00481992	12269.7	0.00425108	12269.4	0.00958331	12269.5	0.00254068	12270.9	0.00361155	12270.2	0.00276355
12270.5	0.00270032	12270	0.00347625	12270	0.0048206	12270	0.00336085	12270	0.00423809	12281.9	0.570629	12270	0.00310935	12269.5	0.0066594	12269.9	0.00592938	12269.9	0.00474767	12269.6	0.00968041	12269.8	0.00285767	12271.1	0.00384278	12270.4	0.00301635
12270.6	0.0024932	12270.2	0.00317777	12270.2	0.0042333	12270.2	0.00373402	12270.2	0.00442468	12282.1	0.558966	12270.2	0.00276791	12269.7	0.00674604	12270.1	0.00469799	12270.2	0.00222803	12269.8	0.00928637	12270	0.00249552	12271.2	0.0051552	12270.6	0.00302958
12270.9	0.0023987	12270.5	0.00358875	12270.5	0.00414388	12270.5	0.00351536	12270.5	0.00424971	12282.3	0.558427	12270.5	0.00229558	12270	0.00815244	12270.4	0.00704766	12270.4	0.00530759	12270	0.012828	12270.2	0.00362982	12271.4	0.00316729	12270.8	0.00341113
12271.1	0.0023805	12270.6	0.00337435	12270.6	0.00647105	12270.6	0.00324681	12270.6	0.00436132	12282.5	0.564552	12270.7	0.00339804	12270.2	0.00872471	12270.6	0.00581766	12270.6	0.00562114	12270.2	0.0126547	12270.4	0.00427648	12271.7	0.00457519	12271	0.00343874
12271.3	0.00215564	12270.9	0.00393697	12270.9	0.00623956	12270.9	0.00399029	12270.9	0.0035438	12282.6	0.569814	12270.9	0.00357479	12270.4	0.00699431	12270.8	0.00411863	12270.8	0.00553885	12270.4	0.0135567	12270.6	0.00410311	12271.9	0.00613042	12271.2	0.00400548
12271.5	0.00296172	12271.1	0.0037471	12271.1	0.00721118	12271.1	0.0046934	12271.1	0.00516609	12282.8	0.586794	12271.1	0.00292585	12270.6	0.00874163	12271	0.00557628	12271	0.00470672	12270.6	0.00752453	12270.8	0.00363712	12272.1	0.00604115	12271.4	0.00319571
12271.7	0.00415854	12271.3	0.00391068	12271.3	0.00478904	12271.3	0.0048295	12271.3	0.004833	12283	0.604383	12271.3	0.0036691	12270.8	0.00782771	12271.2	0.0080751	12271.2	0.00645637	12270.9	0.00906161	12271	0.00444025	12272.3	0.00477784	12271.6	0.00450928
12271.9	0.00463736	12271.5	0.00417882	12271.5	0.00580977	12271.5	0.00537526	12271.5	0.00626956	12283.2	0.626427	12271.5	0.0040415	12271	0.00889981	12271.4	0.00797103	12271.4	0.00560669	12271	0.00860458	12271.2	0.00409864	12272.5	0.00507914	12271.8	0.00532883
12272.1	0.00425522	12271.7	0.00478221	12271.7	0.00618968	12271.7	0.00612298	12271.7	0.00480146	12283.5	0.650217	12271.7	0.00447274	12271.2	0.010212	12271.6	0.00643742	12271.6	0.00735886	12271.2	0.00848362	12271.4	0.00564949	12272.7	0.00723862	12272	0.00533945
12272.3	0.00444473	12271.9	0.00517427	12271.9	0.00729027	12271.9	0.0059161	12271.9	0.00580285	12283.6	0.672017	12271.9	0.00531949	12271.4	0.00783918	12271.8	0.00633931	12271.9	0.00641609	12271.4	0.00981558	12271.6	0.00484117	12272.9	0.0078001	12272.2	0.0054545
12272.5	0.00516102	12272.1	0.00578108	12272.1	0.00683128	12272.1	0.00703413	12272.1	0.00564678	12283.9	0.699011	12272.1	0.00498157	12271.6	0.0108395	12272	0.00845311	12272.1	0.00783024	12271.6	0.011599	12271.9	0.00494093	12273.1	0.0114125	12272.4	0.00613296
12272.7	0.00628538	12272.3	0.00543783	12272.3	0.00735298	12272.3	0.00734083	12272.3	0.0059865	12284	0.718435	12272.4	0.00557768	12271.8	0.0106575	12272.3	0.00954267	12272.3	0.00775027	12271.9	0.0133771	12272.1	0.00532702	12273.3	0.0119957	12272.6	0.00707983
12272.9	0.00791118	12272.5	0.00677632	12272.5	0.00979404	12272.5	0.00740544	12272.5	0.0081356	12284.2	0.744758	12272.5	0.00558133	12272	0.0116831	12272.5	0.00841085	12272.5	0.00958569	12272.1	0.0100018	12272.3	0.00575499	12273.5	0.0122058	12272.8	0.00857298
12273.1	0.00854411	12272.7	0.00719412	12272.7	0.0103796	12272.7	0.008851	12272.7	0.00815277	12284.4	0.768367	12272.8	0.00644582	12272.2	0.0117644	12272.6	0.00955612	12272.7	0.00860959	12272.3	0.00962372	12272.5	0.00698475	12273.7	0.0152389	12273	0.00902852
12273.3	0.00845706	12272.9	0.00847924	12272.9	0.0109368	12272.9	0.00892712	12272.9	0.00959167	12284.6	0.795706	12273	0.0073652	12272.5	0.0117366	12272.9	0.00858008	12272.9	0.00907789	12272.5	0.0120666	12272.7	0.00837385	12274	0.014656	12273.2	0.00991461
12273.5	0.00928046	12273.1	0.00959866	12273.1	0.0111206	12273.1	0.0109383	12273.1	0.0092952	12284.9	0.816431	12273.1	0.00777572	12272.6	0.012394	12273	0.0103077	12273.1	0.00961171	12272.7	0.0140549	12272.9	0.0071905	12274.1	0.0165691	12273.4	0.0115655
12273.8	0.0110083	12273.3	0.0105941	12273.3	0.0124049	12273.3	0.0108571	12273.3	0.0112758	12285.1	0.831605	12273.4	0.00859006	12272.9	0.0125919	12273.2	0.0116332	12273.3	0.0121415	12272.9	0.0131969	12273.1	0.010297	12274.4	0.0204574	12273.6	0.0129987
12274	0.0130701	12273.5	0.0119029	12273.5	0.0153874	12273.5	0.0124683	12273.5	0.0118004	12285.3	0.852029	12273.5	0.0102701	12273.1	0.0122107	12273.5	0.0138202	12273.5	0.0131141	12273.1	0.012269	12273.3	0.0100106	12274.5	0.0242318	12273.8	0.0146105
12274.1	0.0145764	12273.8	0.0132095	12273.8	0.0168766	12273.8	0.0146321	12273.8	0.0136388	12285.5	0.866316	12273.8	0.0117027	12273.3	0.0140148	12273.7	0.0145772	12273.7	0.0125633	12273.3	0.0149302	12273.5	0.0108651	12274.7	0.0295417	12274.1	0.0174164
12274.3	0.0146928	12274	0.0148119	12274	0.0179713	12274	0.0164639	12274	0.0148233	12285.7	0.885995	12274	0.0137624	12273.5	0.0152429	12273.9	0.0181894	12273.9	0.0142951	12273.5	0.0185302	12273.7	0.011732	12275	0.033947	12274.3	0.0214568
12274.5	0.0174957	12274.1	0.0170167	12274.1	0.020352	12274.1	0.0187156	12274.1	0.0171598	12285.9	0.899577	12274.2	0.0150308	12273.7	0.0166346	12274	0.0189574	12274.1	0.0157908	12273.7	0.0162385	12273.9	0.0132981	12275.2	0.0412433	12274.5	0.024357
12274.8	0.0210372	12274.3	0.0193602	12274.3	0.0225504	12274.3	0.0218667	12274.3	0.0183438	12286	0.913258	12274.4	0.0162682	12273.9	0.0160599	12274.2	0.0204551	12274.3	0.0195697	12273.9	0.0151281	12274.1	0.0153142	12275.4	0.0516055	12274.7	0.0299397
12274.9	0.0249899	12274.5	0.0220971	12274.5	0.0277921	12274.5	0.0241948	12274.5	0.0210886	12286.2	0.922439	12274.5	0.0187284	12274.1	0.0164976	12274.4	0.0222972	12274.5	0.0202273	12274.1	0.0186451	12274.3	0.0191894	12275.6	0.0581619	12274.9	0.0328402
12275.2	0.0279693	12274.8	0.0257103	12274.8	0.0295995	12274.8	0.0299003	12274.8	0.0249761	12286.5	0.930946	12274.7	0.021465	12274.3	0.0216088	12274.7	0.0254507	12274.7	0.0224156	12274.3	0.0221699	12274.5	0.0182742	12275.8	0.0697329	12275	0.0395675
12275.4	0.0339819	12274.9	0.0301626	12274.9	0.035937	12274.9	0.0349283	12274.9	0.0279952	12286.7	0.937143	12274.9	0.0256443	12274.5	0.0232267	12274.9	0.0294831	12274.9	0.0257711	12274.5	0.0202493	12274.7	0.024172	12276	0.0868655	12275.2	0.0467328
12275.6	0.0420051	12275.2	0.0361457	12275.2	0.0422966	12275.2	0.0416972	12275.2	0.032616	12286.9	0.942976	12275.2	0.0303173	12274.7	0.0278117	12275.1	0.0321436	12275.1	0.0310142	12274.7	0.0230412	12274.9	0.0259225	12276.1	0.100307	12275.4	0.0548183
12275.8	0.0492862	12275.4	0.0424839	12275.4	0.0514946	12275.4	0.0512856	12275.4	0.0371018	12287.1	0.950783	12275.4	0.0352028	12274.9	0.0306135	12275.3	0.0395482	12275.3	0.0367299	12274.9	0.0322902	12275.1	0.0330394	12276.4	0.117944	12275.7	0.0671499
12276	0.0573694	12275.6	0.0508257	12275.6	0.0613035	12275.6	0.0599033	12275.6	0.042902	12287.3	0.955957	12275.6	0.0418536	12275.1	0.036723	12275.5	0.0455194	12275.5	0.0407619	12275.1	0.0397681	12275.3	0.0369521	12276.5	0.139476	12275.9	0.0817449
12276.2	0.0675695	12275.8	0.0601702	12275.8	0.0713595	12275.8	0.0718096	12275.8	0.0512555	12287.5	0.955887	12275.8	0.0494126	12275.3	0.0408796	12275.7	0.0541795	12275.7	0.0503195	12275.3	0.0449552	12275.5	0.0431658	12276.7	0.168199	12276.1	0.0989381
12276.3	0.0812271	12276	0.0701603	12276	0.0839004	12276	0.0846541	12276	0.0603263	12287.6	0.957885	12276	0.0589082	12275.5	0.0449876	12275.9	0.0631484	12275.9	0.0588418	12275.6	0.0468815	12275.7	0.0520317	12276.9	0.19874	12276.3	0.121497
12276.5	0.0992719	12276.2	0.0827985	12276.2	0.100773	12276.2	0.101133	12276.2	0.0721499	12287.8	0.957186	12276.2	0.0705931	12275.7	0.0547665	12276.1	0.0708774	12276.1	0.0671769	12275.8	0.0583384	12275.9	0.0636795	12277.1	0.229943	12276.5	0.143779
12276.7	0.119782	12276.3	0.0988489	12276.3	0.120263	12276.3	0.118556	12276.3	0.0855013	12288	0.960126	12276.4	0.0821832	12275.9	0.0620875	12276.3	0.0876688	12276.3	0.0836962	12275.9	0.061352	12276.1	0.0752995	12277.3	0.265545	12276.7	0.172258
12276.9	0.146996	12276.5	0.120028	12276.5	0.142053	12276.5	0.143514	12276.5	0.104391	12288.2	0.959396	12276.6	0.100916	12276.1	0.0737929	12276.5	0.103066	12276.5	0.0948722	12276.1	0.0728053	12276.3	0.0889367	12277.5	0.297652	12276.9	0.2092
12277.1	0.181903	12276.7	0.146555	12276.7	0.169237	12276.7	0.170523	12276.7	0.126455	12288.5	0.95607	12276.8	0.121455	12276.3	0.0819411	12276.7	0.124913	12276.7	0.11586	12276.3	0.0857871	12276.5	0.109188	12277.7	0.328925	12277.1	0.246376
12277.3	0.218833	12276.9	0.177352	12276.9	0.200599	12276.9	0.200818	12276.9	0.154199	12288.6	0.954259	12277	0.147379	12276.5	0.0973491	12276.9	0.151287	12276.9	0.145	12276.5	0.102721	12276.7	0.129926	12277.8	0.359222	12277.3	0.291153
12277.5	0.261482	12277.1	0.212276	12277.1	0.235717	12277.1	0.236362	12277.1	0.190103	12288.8	0.950056	12277.2	0.184862	12276.7	0.118707	12277.1	0.182334	12277.1	0.17308	12276.7	0.116763	12276.9	0.1598	12278	0.39692	12277.5	0.342489
12277.7	0.305719	12277.3	0.252643	12277.3	0.270427	12277.3	0.268344	12277.3	0.227412	12289	0.949815	12277.4	0.221284	12276.9	0.141586	12277.2	0.208584	12277.3	0.210139	12276.9	0.143996	12277.1	0.187638	12278.2	0.429329	12277.7	0.388409
12277.9	0.366627	12277.5	0.299436	12277.5	0.31127	12277.5	0.303941	12277.5	0.273941	12289.2	0.947142	12277.5	0.267934	12277.1	0.172812	12277.4	0.249063	12277.5	0.249006	12277.1	0.179251	12277.3	0.227041	12278.4	0.456061	12277.9	0.436038
12278	0.423682	12277.7	0.345272	12277.7	0.347465	12277.7	0.337378	12277.7	0.323637	12289.4	0.939008	12277.7	0.313443	12277.3	0.208068	12277.6	0.286672	12277.6	0.288154	12277.3	0.215107	12277.5	0.269966	12278.6	0.484575	12278	0.481801
12278.2	0.488439	12277.9	0.395223	12277.9	0.391205	12277.9	0.375508	12277.9	0.380215	12289.6	0.93409	12277.9	0.371084	12277.5	0.246485	12277.8	0.329569	12277.8	0.344235	12277.5	0.256567	12277.6	0.311535	12278.8	0.504206	12278.2	0.514532
12278.4	0.562188	12278	0.448235	12278	0.43104	12278	0.409531	12278	0.439898	12289.8	0.935935	12278.1	0.425815	12277.6	0.291497	12278	0.386759	12278	0.398721	12277.6	0.305868	12277.8	0.365133	12279	0.521334	12278.4	0.550206
12278.6	0.627019	12278.2	0.506047	12278.2	0.47018	12278.2	0.444943	12278.2	0.50626	12290	0.93154	12278.3	0.492733	12277.8	0.333101	12278.1	0.441136	12278.2	0.466705	12277.8	0.348751	12278	0.417438	12279.2	0.529399	12278.6	0.584879
12278.9	0.690456	12278.4	0.565278	12278.4	0.509871	12278.4	0.479795	12278.4	0.580595	12290.2	0.930973	12278.5	0.563952	12278	0.393462	12278.4	0.503673	12278.4	0.539002	12278	0.413218	12278.2	0.480814	12279.4	0.537334	12278.8	0.606163
12279	0.746409	12278.6	0.613477	12278.6	0.543317	12278.6	0.507984	12278.6	0.641094	12290.4	0.928169	12278.6	0.621488	12278.2	0.449389	12278.5	0.557605	12278.6	0.596248	12278.2	0.480054	12278.4	0.537542	12279.6	0.54509	12279	0.619674
12279.2	0.790191	12278.9	0.664529	12278.9	0.579455	12278.9	0.53664	12278.9	0.705766	12290.6	0.926296	12278.9	0.687862	12278.4	0.512205	12278.8	0.617341	12278.8	0.666753	12278.4	0.558224	12278.6	0.597621	12279.8	0.546218	12279.2	0.62437
12279.4	0.817154	12279	0.701757	12279	0.603634	12279	0.557995	12279	0.753936	12290.8	0.926164	12279	0.736631	12278.6	0.580813	12279	0.662643	12279	0.722202	12278.6	0.615787	12278.8	0.653629	12280	0.547651	12279.4	0.618435
12279.6	0.835285	12279.2	0.728896	12279.2	0.621143	12279.2	0.573276	12279.2	0.799262	12290.9	0.921262	12279.2	0.783531	12278.8	0.635371	12279.1	0.704527	12279.2	0.762254	12278.8	0.692995	12279	0.694637	12280.2	0.54264	12279.6	0.611681
12279.8	0.837928	12279.4	0.743998	12279.4	0.628407	12279.4	0.583469	12279.4	0.825582	12291.1	0.917911	12279.4	0.81379	12279	0.691502	12279.3	0.730994	12279.4	0.804267	12279	0.730395	12279.2	0.740204	12280.4	0.552749	12279.7	0.598827
12280	0.831996	12279.6	0.749609	12279.6	0.637151	12279.6	0.590226	12279.6	0.839621	12291.3	0.915687	12279.6	0.83442	12279.2	0.732401	12279.5	0.755824	12279.5	0.824025	12279.2	0.779455	12279.4	0.765903	12280.6	0.55075	12279.9	0.580957
12280.2	0.817866	12279.8	0.750239	12279.8	0.64103	12279.8	0.594599	12279.8	0.846449	12291.5	0.913271	12279.8	0.838667	12279.4	0.768825	12279.7	0.768345	12279.7	0.835246	12279.4	0.814093	12279.5	0.788179	12280.8	0.543315	12280.1	0.562314
12280.4	0.790235	12280	0.74668	12280	0.63659	12280	0.594755	12280	0.837977	12291.7	0.912991	12280	0.827935	12279.5	0.789764	12279.9	0.76913	12279.9	0.831049	12279.6	0.838683	12279.7	0.797907	12281	0.541016	12280.3	0.546806
12280.6	0.758065	12280.2	0.721698	12280.2	0.630137	12280.2	0.590178	12280.2	0.815575	12291.9	0.911916	12280.2	0.814927	12279.7	0.801574	12280.1	0.760758	12280.1	0.81817	12279.8	0.843644	12279.9	0.788453	12281.1	0.551092	12280.5	0.527365
12280.8	0.7218	12280.4	0.697326	12280.4	0.620942	12280.4	0.587909	12280.4	0.782608	12292.1	0.911015	12280.4	0.788467	12279.9	0.802915	12280.3	0.742309	12280.4	0.791897	12280	0.836508	12280.2	0.771344	12281.3	0.558332	12280.7	0.517536
12281	0.684955	12280.6	0.677734	12280.6	0.606374	12280.6	0.584262	12280.6	0.748688	12292.3	0.91236	12280.6	0.754473	12280.1	0.79268	12280.5	0.720859	12280.6	0.756543	12280.2	0.833516	12280.4	0.747893	12281.5	0.55541	12280.9	0.507619
12281.1	0.650022	12280.8	0.648329	12280.8	0.595429	12280.8	0.573248	12280.8	0.715891	12292.5	0.910209	12280.8	0.721387	12280.3	0.77171	12280.7	0.696145	12280.7	0.727471	12280.4	0.80076	12280.6	0.722917	12281.7	0.558831	12281.1	0.499655
12281.3	0.62294	12281	0.624628	12281	0.583221	12281	0.567247	12281	0.681088	12292.6	0.910916	12281	0.682259	12280.5	0.753681	12280.9	0.668299	12280.9	0.688827	12280.6	0.767128	12280.7	0.694705	12281.9	0.568874	12281.3	0.500468
12281.5	0.594563	12281.1	0.598773	12281.1	0.572347	12281.1	0.564511	12281.1	0.641849	12292.8	0.910062	12281.2	0.648383	12280.7	0.724154	12281.1	0.636058	12281.1	0.65347	12280.7	0.735614	12280.9	0.660082	12282.1	0.575008	12281.5	0.502138
12281.7	0.574678	12281.3	0.578635	12281.3	0.565004	12281.3	0.559199	12281.3	0.608297	12293	0.911144	12281.4	0.616971	12280.9	0.689706	12281.3	0.612814	12281.3	0.622956	12280.9	0.702479	12281.1	0.630502	12282.3	0.579932	12281.7	0.506608
12281.9	0.564117	12281.5	0.562864	12281.5	0.557403	12281.5	0.556095	12281.5	0.580599	12293.2	0.90925	12281.6	0.590607	12281.1	0.656147	12281.5	0.587684	12281.5	0.592708	12281.1	0.664299	12281.3	0.59582	12282.5	0.590147	12281.9	0.509604
12282.1	0.556409	12281.7	0.549875	12281.7	0.555567	12281.7	0.555946	12281.7	0.560867	12293.5	0.910654	12281.8	0.572698	12281.3	0.627914	12281.7	0.568046	12281.7	0.571036	12281.3	0.628113	12281.5	0.575971	12282.7	0.6004	12282.1	0.522644
12282.3	0.564479	12281.9	0.546668	12281.9	0.556768	12281.9	0.560514	12281.9	0.548462	12293.6	0.907356	12282	0.557147	12281.5	0.601517	12281.9	0.555923	12281.9	0.554571	12281.5	0.613498	12281.7	0.56303	12282.9	0.612489	12282.3	0.533676
12282.5	0.572597	12282.1	0.547816	12282.1	0.560215	12282.1	0.563409	12282.1	0.54436	12293.8	0.908667	12282.1	0.557527	12281.7	0.577764	12282	0.551232	12282	0.546489	12281.7	0.582753	12281.9	0.556103	12283.1	0.625206	12282.5	0.548583
12282.7	0.583875	12282.3	0.554041	12282.3	0.565615	12282.3	0.567775	12282.3	0.547086	12294	0.910945	12282.3	0.561161	12281.9	0.565591	12282.2	0.549342	12282.2	0.541375	12281.9	0.574745	12282.1	0.552618	12283.3	0.636516	12282.7	0.565863
12282.9	0.601447	12282.5	0.566288	12282.5	0.571623	12282.5	0.577981	12282.5	0.557096	12294.2	0.911486	12282.5	0.56499	12282.1	0.558128	12282.4	0.555837	12282.4	0.550944	12282.1	0.565599	12282.3	0.556047	12283.5	0.647197	12282.9	0.580984
12283.1	0.619268	12282.7	0.577058	12282.7	0.584631	12282.7	0.585909	12282.7	0.565263	12294.4	0.910083	12282.7	0.581242	12282.2	0.560392	12282.6	0.566862	12282.6	0.55548	12282.3	0.567816	12282.4	0.556904	12283.7	0.658675	12283	0.595361
12283.3	0.642072	12282.9	0.591577	12282.9	0.595117	12282.9	0.595365	12282.9	0.583112	12294.6	0.908115	12282.9	0.59656	12282.4	0.566276	12282.8	0.579142	12282.8	0.570635	12282.5	0.560315	12282.6	0.570113	12283.9	0.669227	12283.2	0.616607
12283.5	0.664954	12283.1	0.611521	12283.1	0.606188	12283.1	0.607063	12283.1	0.602205	12294.8	0.907208	12283.1	0.616121	12282.6	0.5745	12283	0.594277	12283	0.587057	12282.6	0.581073	12282.8	0.583344	12284.1	0.681425	12283.4	0.633814
12283.7	0.686289	12283.3	0.629338	12283.3	0.62612	12283.3	0.619331	12283.3	0.623314	12295	0.909152	12283.3	0.63903	12282.8	0.587543	12283.2	0.615037	12283.2	0.606515	12282.9	0.603778	12283	0.599717	12284.3	0.695156	12283.6	0.656343
12283.9	0.713529	12283.5	0.651607	12283.5	0.639288	12283.5	0.631942	12283.5	0.647381	12295.2	0.909396	12283.5	0.662447	12283	0.606148	12283.4	0.633276	12283.4	0.633106	12283	0.605256	12283.2	0.620643	12284.5	0.701916	12283.8	0.676783
12284.1	0.732597	12283.7	0.673929	12283.7	0.654989	12283.7	0.646361	12283.7	0.672475	12295.4	0.910646	12283.7	0.68627	12283.2	0.622524	12283.6	0.654243	12283.6	0.654232	12283.3	0.630071	12283.4	0.648585	12284.7	0.712402	12284	0.69612
12284.3	0.754772	12283.9	0.6935	12283.9	0.67286	12283.9	0.659433	12283.9	0.694321	12295.6	0.911972	12283.9	0.708674	12283.4	0.64419	12283.8	0.675304	12283.8	0.679428	12283.5	0.65662	12283.6	0.672383	12284.9	0.726938	12284.2	0.722668
12284.5	0.772492	12284.1	0.715784	12284.1	0.68848	12284.1	0.671125	12284.1	0.71526	12295.8	0.910992	12284.1	0.731533	12283.6	0.665825	12284	0.698934	12284	0.702833	12283.7	0.691793	12283.9	0.690649	12285.1	0.740512	12284.4	0.738327
12284.7	0.802858	12284.3	0.737512	12284.3	0.703456	12284.3	0.68304	12284.3	0.738567	12295.9	0.91136	12284.3	0.759132	12283.8	0.691267	12284.2	0.717821	12284.2	0.72545	12283.9	0.697899	12284	0.715829	12285.3	0.744452	12284.6	0.755735
12284.9	0.828114	12284.5	0.755734	12284.5	0.718069	12284.5	0.696292	12284.5	0.76264	12296.1	0.908647	12284.5	0.783035	12284	0.709459	12284.4	0.73795	12284.4	0.746324	12284.1	0.720487	12284.3	0.736048	12285.5	0.760939	12284.8	0.775692
12285.1	0.848412	12284.7	0.772714	12284.7	0.732442	12284.7	0.711834	12284.7	0.784635	12296.3	0.91316	12284.7	0.804441	12284.2	0.728355	12284.6	0.762025	12284.6	0.77108	12284.3	0.750453	12284.4	0.756499	12285.7	0.768288	12285	0.792405
12285.3	0.863894	12284.9	0.79306	12284.9	0.747233	12284.9	0.725462	12284.9	0.809348	12296.6	0.913424	12284.9	0.824588	12284.4	0.751114	12284.9	0.784664	12284.9	0.793501	12284.4	0.782489	12284.7	0.777019	12285.9	0.77765	12285.3	0.798057
12285.5	0.882382	12285.1	0.815059	12285.1	0.767172	12285.1	0.738575	12285.1	0.82891	12296.8	0.916643	12285.2	0.840903	12284.6	0.778868	12285.1	0.800577	12285.1	0.814369	12284.7	0.798292	12284.9	0.80374	12286.1	0.783635	12285.5	0.816843
12285.7	0.898833	12285.3	0.831766	12285.3	0.780046	12285.3	0.752351	12285.3	0.853854	12297	0.917071	12285.4	0.859952	12284.9	0.798259	12285.3	0.818038	12285.3	0.837706	12284.9	0.823152	12285.1	0.820468	12286.3	0.787483	12285.7	0.831809
12285.9	0.904611	12285.5	0.843934	12285.5	0.793076	12285.5	0.764452	12285.5	0.872637	12297.2	0.920644	12285.6	0.878604	12285.1	0.816621	12285.5	0.834812	12285.5	0.85317	12285.1	0.845153	12285.3	0.839843	12286.5	0.800449	12285.9	0.845249
12286.1	0.911807	12285.7	0.859518	12285.7	0.807613	12285.7	0.777841	12285.7	0.886413	12297.4	0.921342	12285.8	0.893832	12285.3	0.839532	12285.7	0.851077	12285.6	0.870242	12285.3	0.852654	12285.5	0.861907	12286.7	0.811613	12286.1	0.852112
12286.3	0.925726	12285.9	0.872061	12285.9	0.819102	12285.9	0.787391	12285.9	0.899386	12297.6	0.923176	12285.9	0.904338	12285.5	0.859306	12285.8	0.860633	12285.8	0.882922	12285.5	0.886716	12285.7	0.871769	12286.9	0.816327	12286.3	0.859716
12286.5	0.931578	12286.1	0.881201	12286.1	0.829148	12286.1	0.798519	12286.1	0.912693	12297.8	0.92306	12286.1	0.912444	12285.7	0.873576	12286	0.871769	12286	0.898183	12285.7	0.894653	12285.9	0.882797	12287.1	0.826914	12286.5	0.862199
12286.7	0.939562	12286.3	0.895172	12286.3	0.834623	12286.3	0.809574	12286.3	0.925015	12298	0.927295	12286.3	0.921726	12285.9	0.88365	12286.2	0.888516	12286.2	0.910311	12285.9	0.903232	12286.1	0.893018	12287.3	0.836385	12286.7	0.87411
12286.9	0.94589	12286.5	0.903919	12286.5	0.846302	12286.5	0.820432	12286.5	0.93409	12298.2	0.929138	12286.5	0.932157	12286	0.896241	12286.4	0.900684	12286.4	0.920851	12286.1	0.914529	12286.2	0.902967	12287.5	0.83698	12286.9	0.87597
12287.1	0.951032	12286.7	0.904347	12286.7	0.854839	12286.7	0.828535	12286.7	0.939953	12298.5	0.931398	12286.7	0.94108	12286.2	0.903096	12286.6	0.907999	12286.6	0.936094	12286.3	0.919544	12286.5	0.917079	12287.7	0.844063	12287.2	0.878428
12287.3	0.957712	12286.9	0.911845	12286.9	0.865319	12286.9	0.839119	12286.9	0.947809	12298.7	0.936094	12286.9	0.949772	12286.4	0.912683	12286.8	0.914762	12286.8	0.937005	12286.5	0.94445	12286.6	0.92631	12287.9	0.852631	12287.4	0.879178
12287.5	0.95479	12287.1	0.919095	12287.1	0.868502	12287.1	0.846532	12287.1	0.953607	12298.9	0.933788	12287.1	0.952809	12286.7	0.920732	12287	0.919008	12287	0.94591	12286.7	0.942037	12286.9	0.93389	12288.1	0.854243	12287.6	0.885108
12287.7	0.959385	12287.3	0.924555	12287.3	0.869689	12287.3	0.853192	12287.3	0.95686	12299	0.933834	12287.3	0.949568	12286.9	0.926869	12287.2	0.922091	12287.2	0.950923	12286.9	0.95715	12287	0.938329	12288.3	0.855669	12287.8	0.88762
12287.9	0.961377	12287.5	0.929477	12287.5	0.875303	12287.5	0.858113	12287.5	0.959419	12299.2	0.939905	12287.5	0.956664	12287.1	0.94061	12287.4	0.92571	12287.4	0.955048	12287.1	0.946007	12287.2	0.944435	12288.5	0.863869	12288	0.8875
12288.1	0.955564	12287.7	0.930173	12287.7	0.880634	12287.7	0.864891	12287.7	0.965405	12299.5	0.945274	12287.7	0.956463	12287.2	0.940782	12287.6	0.930889	12287.6	0.957006	12287.3	0.946161	12287.4	0.940231	12288.7	0.867399	12288.2	0.891601
12288.3	0.955266	12287.9	0.928428	12287.9	0.884274	12287.9	0.86886	12287.9	0.964668	12299.7	0.946525	12287.9	0.953867	12287.4	0.943028	12287.8	0.92942	12287.8	0.958357	12287.5	0.948886	12287.6	0.94412	12288.9	0.866081	12288.4	0.896535
12288.5	0.951121	12288.1	0.929978	12288.1	0.887073	12288.1	0.872374	12288.1	0.963464	12299.9	0.947642	12288.1	0.957345	12287.6	0.944101	12288	0.931679	12288	0.957613	12287.7	0.959621	12287.8	0.945219	12289.1	0.876411	12288.6	0.887281
12288.7	0.95206	12288.3	0.930271	12288.3	0.887682	12288.3	0.875797	12288.3	0.961179	12300.1	0.947916	12288.3	0.953719	12287.8	0.943682	12288.2	0.935123	12288.2	0.955071	12287.9	0.965673	12288	0.945962	12289.3	0.874343	12288.8	0.894429
12288.9	0.947048	12288.5	0.930961	12288.5	0.891686	12288.5	0.881514	12288.5	0.96044	12300.3	0.951091	12288.5	0.953403	12288	0.939944	12288.4	0.93538	12288.5	0.959239	12288.1	0.959141	12288.3	0.94591	12289.5	0.8798	12289	0.893485
12289.1	0.94298	12288.7	0.929724	12288.7	0.892516	12288.7	0.883959	12288.7	0.955247	12300.5	0.951336	12288.7	0.945757	12288.2	0.946082	12288.6	0.931186	12288.6	0.9565	12288.3	0.960935	12288.5	0.943333	12289.7	0.880132	12289.3	0.892857
12289.3	0.945724	12288.9	0.93123	12288.9	0.891998	12288.9	0.886183	12288.9	0.955959	12300.6	0.956374	12288.9	0.946304	12288.4	0.944536	12288.8	0.928392	12288.8	0.952505	12288.5	0.955433	12288.7	0.942374	12289.9	0.881289	12289.5	0.892868
12289.5	0.94056	12289.1	0.930125	12289.1	0.891577	12289.1	0.888725	12289.1	0.953153	12300.9	0.959518	12289.1	0.942825	12288.6	0.947624	12289	0.931193	12289	0.953277	12288.7	0.959157	12288.9	0.940809	12290	0.882398	12289.7	0.890048
12289.6	0.939218	12289.3	0.926591	12289.3	0.89616	12289.3	0.890064	12289.3	0.951597	12301	0.960571	12289.3	0.942151	12288.8	0.940465	12289.2	0.928824	12289.2	0.952672	12288.9	0.956169	12289	0.942309	12290.2	0.880678	12289.9	0.895049
12289.9	0.939955	12289.5	0.925874	12289.5	0.894966	12289.5	0.891327	12289.5	0.948453	12301.3	0.968607	12289.5	0.936926	12289	0.941704	12289.4	0.927597	12289.4	0.952066	12289	0.949178	12289.2	0.938809	12290.4	0.885411	12290.1	0.894192
12290	0.931781	12289.6	0.926266	12289.6	0.896615	12289.6	0.891622	12289.6	0.944313	12301.5	0.969092	12289.7	0.933261	12289.2	0.938348	12289.6	0.928512	12289.6	0.94376	12289.2	0.948245	12289.4	0.928665	12290.6	0.883158	12290.3	0.898211
12290.2	0.929652	12289.9	0.924142	12289.9	0.893929	12289.9	0.891758	12289.9	0.941548	12301.7	0.969656	12289.9	0.937782	12289.4	0.935773	12289.8	0.919158	12289.8	0.943282	12289.4	0.959093	12289.6	0.928856	12290.8	0.881145	12290.5	0.900021
12290.5	0.924406	12290	0.921305	12290	0.897115	12290	0.892927	12290	0.938824	12301.9	0.970991	12290.1	0.934836	12289.6	0.932867	12290	0.914375	12290	0.93929	12289.6	0.953388	12289.8	0.926095	12291	0.886418	12290.7	0.89292
12290.6	0.912148	12290.2	0.917748	12290.2	0.896863	12290.2	0.891828	12290.2	0.935199	12302.1	0.971426	12290.3	0.931104	12289.8	0.929967	12290.2	0.915609	12290.2	0.939162	12289.8	0.944179	12290	0.923377	12291.2	0.886038	12290.9	0.899672
12290.8	0.918858	12290.5	0.921108	12290.5	0.895012	12290.5	0.891595	12290.5	0.931205	12302.3	0.97588	12290.5	0.923878	12290	0.92482	12290.4	0.913675	12290.4	0.933805	12290	0.936262	12290.2	0.925251	12291.4	0.888087	12291.1	0.89387
12291	0.91814	12290.6	0.916949	12290.6	0.893895	12290.6	0.893624	12290.6	0.9328	12302.5	0.9769	12290.6	0.926238	12290.2	0.923619	12290.5	0.913566	12290.5	0.931596	12290.2	0.931981	12290.4	0.920954	12291.6	0.884099	12291.3	0.895716
12291.2	0.916265	12290.8	0.914543	12290.8	0.897215	12290.8	0.890179	12290.8	0.931176	12302.7	0.977537	12290.8	0.922625	12290.4	0.920167	12290.7	0.913669	12290.7	0.927426	12290.4	0.930939	12290.6	0.91668	12291.8	0.884627	12291.5	0.89422
12291.4	0.913706	12291	0.911469	12291	0.896095	12291	0.889089	12291	0.927318	12302.9	0.981221	12291	0.916283	12290.6	0.922655	12290.9	0.911264	12290.9	0.928277	12290.6	0.931445	12290.8	0.916639	12291.9	0.88626	12291.6	0.897811
12291.6	0.913569	12291.2	0.913542	12291.2	0.895964	12291.2	0.890492	12291.2	0.92573	12303.1	0.983694	12291.2	0.9198	12290.8	0.917125	12291.1	0.911774	12291.1	0.927573	12290.8	0.920721	12290.9	0.918367	12292.1	0.883653	12291.8	0.897078
12291.8	0.911298	12291.4	0.913274	12291.4	0.895041	12291.4	0.891572	12291.4	0.924332	12303.3	0.985699	12291.4	0.915796	12290.9	0.913881	12291.3	0.908014	12291.3	0.926593	12291	0.920731	12291.1	0.916886	12292.3	0.888508	12292	0.89657
12292	0.91041	12291.6	0.90773	12291.6	0.897916	12291.6	0.891057	12291.6	0.923385	12303.5	0.986371	12291.6	0.915455	12291.1	0.91427	12291.5	0.906103	12291.5	0.924995	12291.1	0.920172	12291.3	0.918544	12292.5	0.888909	12292.2	0.897485
12292.1	0.911316	12291.8	0.910008	12291.8	0.895881	12291.8	0.891187	12291.8	0.924349	12303.7	0.988707	12291.8	0.915202	12291.3	0.914061	12291.7	0.907778	12291.7	0.924491	12291.3	0.922387	12291.5	0.917695	12292.7	0.889111	12292.4	0.898604
12292.3	0.908009	12292	0.908649	12292	0.897604	12292	0.890597	12292	0.921992	12303.9	0.990305	12292	0.918087	12291.5	0.915952	12291.9	0.904635	12291.9	0.923239	12291.5	0.924836	12291.7	0.910557	12292.9	0.889506	12292.6	0.900955
12292.5	0.904716	12292.1	0.909841	12292.1	0.901253	12292.1	0.889842	12292.1	0.917667	12304	0.99334	12292.2	0.91791	12291.7	0.915841	12292.1	0.904306	12292.1	0.915867	12291.7	0.928549	12291.9	0.904951	12293.1	0.894333	12292.8	0.90009
12292.7	0.910068	12292.3	0.906549	12292.3	0.899865	12292.3	0.890559	12292.3	0.915706	12304.2	0.992895	12292.3	0.915144	12291.9	0.913102	12292.2	0.909045	12292.2	0.919315	12291.9	0.913199	12292.1	0.908511	12293.3	0.900069	12293	0.900326
12292.9	0.904251	12292.5	0.9054	12292.5	0.897091	12292.5	0.893293	12292.5	0.915677	12304.4	0.996507	12292.5	0.916085	12292.1	0.913044	12292.4	0.904477	12292.4	0.921619	12292.1	0.918623	12292.3	0.9087	12293.5	0.898894	12293.2	0.906404
12293.1	0.904532	12292.7	0.910985	12292.7	0.898369	12292.7	0.892245	12292.7	0.915259	12304.6	0.998292	12292.7	0.914336	12292.2	0.910972	12292.6	0.901837	12292.6	0.915915	12292.3	0.909099	12292.5	0.90878	12293.7	0.9075	12293.4	0.904489
12293.3	0.906706	12292.9	0.908683	12292.9	0.898519	12292.9	0.89321	12292.9	0.918033	12304.8	0.999084	12292.9	0.909345	12292.4	0.90859	12292.8	0.906439	12292.8	0.916659	12292.5	0.908931	12292.7	0.906949	12293.9	0.906526	12293.6	0.908023
12293.5	0.906781	12293.1	0.910829	12293.1	0.900685	12293.1	0.895956	12293.1	0.919261	12305	1.00009	12293.1	0.907459	12292.6	0.910119	12293	0.90913	12293	0.919124	12292.7	0.921005	12292.9	0.911319	12294	0.910853	12293.8	0.907203
12293.7	0.906209	12293.3	0.906748	12293.3	0.905136	12293.3	0.900311	12293.3	0.918536	12305.2	1.00542	12293.3	0.909221	12292.8	0.910444	12293.2	0.90552	12293.2	0.919144	12292.9	0.9166	12293	0.914224	12294.2	0.914622	12294	0.905477
12293.9	0.909774	12293.5	0.909907	12293.5	0.904742	12293.5	0.902272	12293.5	0.91626	12305.4	1.00744	12293.5	0.910496	12293	0.910445	12293.4	0.904389	12293.4	0.918491	12293.1	0.912856	12293.3	0.91204	12294.4	0.920864	12294.2	0.910887
12294	0.907275	12293.7	0.908613	12293.7	0.908858	12293.7	0.904265	12293.7	0.915248	12305.6	1.00595	12293.7	0.912812	12293.2	0.908357	12293.6	0.907708	12293.6	0.917965	12293.3	0.91701	12293.5	0.914776	12294.6	0.919728	12294.4	0.909073
12294.2	0.905155	12293.9	0.91394	12293.9	0.909812	12293.9	0.907537	12293.9	0.917531	12305.8	1.00951	12293.9	0.910881	12293.4	0.911528	12293.8	0.908255	12293.8	0.917384	12293.5	0.910047	12293.6	0.909373	12294.8	0.928733	12294.6	0.904235
12294.5	0.908367	12294	0.910069	12294	0.908384	12294	0.908935	12294	0.920106	12306	1.01114	12294.1	0.908506	12293.6	0.911646	12294	0.906589	12294	0.914929	12293.7	0.920857	12293.9	0.914043	12295	0.930365	12294.8	0.912483
12294.6	0.906644	12294.2	0.9065	12294.2	0.910851	12294.2	0.912592	12294.2	0.921395	12306.2	1.00984	12294.3	0.90984	12293.8	0.910312	12294.2	0.908556	12294.2	0.915957	12293.9	0.915823	12294	0.916894	12295.2	0.933332	12295	0.914241
12294.9	0.907161	12294.5	0.909513	12294.5	0.915247	12294.5	0.916417	12294.5	0.918328	12306.5	1.01201	12294.5	0.914591	12294	0.90993	12294.4	0.910638	12294.3	0.916403	12294	0.905579	12294.2	0.918284	12295.4	0.935701	12295.2	0.914339
12295	0.909708	12294.6	0.910153	12294.6	0.917044	12294.6	0.922439	12294.6	0.917455	12306.7	1.01606	12294.7	0.913748	12294.2	0.90799	12294.5	0.909464	12294.5	0.918184	12294.2	0.91362	12294.4	0.914679	12295.6	0.937553	12295.4	0.920917
12295.2	0.908455	12294.9	0.91239	12294.9	0.919389	12294.9	0.925946	12294.9	0.917917	12306.9	1.01891	12294.9	0.910857	12294.4	0.910488	12294.8	0.911079	12294.8	0.92243	12294.4	0.901835	12294.6	0.911928	12295.8	0.941475	12295.6	0.919907
12295.4	0.908259	12295	0.913827	12295	0.923352	12295	0.929695	12295	0.91967	12307.1	1.0218	12295	0.913106	12294.6	0.915208	12295	0.912651	12294.9	0.916788	12294.6	0.896338	12294.8	0.911749	12296	0.952084	12295.8	0.923645
12295.6	0.911035	12295.2	0.916161	12295.2	0.926356	12295.2	0.934731	12295.2	0.918226	12307.2	1.02285	12295.2	0.911219	12294.8	0.913441	12295.1	0.91259	12295.1	0.921196	12294.8	0.90502	12295	0.914611	12296.2	0.956132	12296	0.923212
12295.8	0.910729	12295.4	0.917164	12295.4	0.932439	12295.4	0.93902	12295.4	0.918506	12307.5	1.02099	12295.4	0.911249	12295	0.912606	12295.3	0.91264	12295.3	0.915431	12295	0.911623	12295.2	0.916064	12296.4	0.958614	12296.1	0.925079
12296	0.91682	12295.6	0.919477	12295.6	0.931136	12295.6	0.941871	12295.6	0.91723	12307.6	1.02045	12295.6	0.911769	12295.2	0.914701	12295.5	0.915561	12295.5	0.916856	12295.2	0.913426	12295.4	0.914288	12296.6	0.96003	12296.3	0.930148
12296.2	0.910982	12295.8	0.916687	12295.8	0.934991	12295.8	0.946018	12295.8	0.917758	12307.9	1.02821	12295.8	0.921253	12295.4	0.911963	12295.7	0.916932	12295.7	0.918346	12295.4	0.922114	12295.5	0.917844	12296.8	0.960936	12296.5	0.929197
12296.4	0.914625	12296	0.920045	12296	0.934748	12296	0.949177	12296	0.918294	12308.1	1.02818	12296	0.914769	12295.5	0.917768	12295.9	0.91757	12295.9	0.919701	12295.6	0.917391	12295.7	0.92023	12297	0.967791	12296.7	0.929008
12296.6	0.91955	12296.2	0.919069	12296.2	0.94155	12296.2	0.955104	12296.2	0.920771	12308.2	1.02747	12296.2	0.915074	12295.7	0.918814	12296.1	0.919522	12296.1	0.920443	12295.8	0.909446	12295.9	0.918098	12297.2	0.971637	12296.9	0.937592
12296.8	0.919853	12296.4	0.920496	12296.4	0.941195	12296.4	0.959867	12296.4	0.920934	12308.5	1.03212	12296.4	0.914641	12295.9	0.920392	12296.3	0.916801	12296.3	0.920374	12296	0.919457	12296.1	0.92186	12297.4	0.978677	12297.1	0.936973
12297	0.918228	12296.6	0.924767	12296.6	0.945922	12296.6	0.96296	12296.6	0.92139	12308.6	1.0344	12296.6	0.915411	12296.1	0.920404	12296.5	0.921531	12296.5	0.916589	12296.2	0.909752	12296.4	0.923618	12297.6	0.983569	12297.3	0.943874
12297.2	0.919637	12296.8	0.929195	12296.8	0.948284	12296.8	0.964347	12296.8	0.922417	12308.8	1.03559	12296.9	0.917887	12296.3	0.923397	12296.8	0.924595	12296.7	0.924724	12296.4	0.912935	12296.6	0.921361	12297.9	0.981312	12297.5	0.941718
12297.4	0.921124	12297	0.92832	12297	0.950187	12297	0.968928	12297	0.923831	12309	1.03585	12297.1	0.918529	12296.5	0.923543	12297	0.927832	12296.9	0.922762	12296.6	0.924715	12296.8	0.924838	12298.1	0.984824	12297.7	0.938534
12297.6	0.920769	12297.2	0.928248	12297.2	0.955779	12297.2	0.972683	12297.2	0.924475	12309.2	1.03593	12297.2	0.921613	12296.8	0.92197	12297.2	0.92623	12297.1	0.924413	12296.8	0.923537	12297	0.928996	12298.3	0.989213	12297.9	0.948775
12297.9	0.922764	12297.4	0.926233	12297.4	0.957086	12297.4	0.976964	12297.4	0.929432	12309.4	1.03798	12297.5	0.925494	12297	0.923163	12297.4	0.927865	12297.3	0.925994	12297	0.917582	12297.2	0.928272	12298.5	0.990897	12298.1	0.947251
12298.1	0.925586	12297.6	0.932511	12297.6	0.960913	12297.6	0.980276	12297.6	0.928544	12309.6	1.03936	12297.7	0.924802	12297.2	0.928707	12297.6	0.932229	12297.5	0.926483	12297.2	0.916493	12297.4	0.931575	12298.7	0.989944	12298.4	0.950936
12298.3	0.930355	12297.9	0.937545	12297.9	0.965099	12297.9	0.980215	12297.9	0.928006	12309.9	1.04083	12297.9	0.926395	12297.4	0.927457	12297.8	0.933382	12297.7	0.928129	12297.4	0.919752	12297.6	0.931949	12298.9	0.997898	12298.6	0.954946
12298.5	0.934102	12298.1	0.934861	12298.1	0.961628	12298.1	0.982975	12298.1	0.928808	12310.1	1.04096	12298.1	0.932021	12297.6	0.931403	12298	0.934838	12298	0.932328	12297.6	0.922258	12297.8	0.934991	12299.1	1.00094	12298.8	0.9566
12298.7	0.935802	12298.3	0.937981	12298.3	0.96846	12298.3	0.986025	12298.3	0.930303	12310.3	1.04266	12298.3	0.93143	12297.8	0.934688	12298.2	0.937298	12298.2	0.931148	12297.8	0.923611	12298.1	0.943142	12299.3	1.00102	12299	0.96169
12298.9	0.941272	12298.5	0.942303	12298.5	0.971094	12298.5	0.988019	12298.5	0.932031	12310.5	1.04612	12298.5	0.935989	12298	0.934178	12298.4	0.938774	12298.4	0.930815	12298	0.931384	12298.3	0.943132	12299.5	1.00132	12299.2	0.962994
12299.1	0.941131	12298.7	0.943239	12298.7	0.972112	12298.7	0.992052	12298.7	0.937224	12310.7	1.04972	12298.7	0.937123	12298.2	0.935938	12298.6	0.945956	12298.6	0.934539	12298.3	0.942005	12298.5	0.946165	12299.7	1.00256	12299.4	0.963332
12299.3	0.940988	12298.9	0.946106	12298.9	0.977105	12298.9	0.994415	12298.9	0.938873	12310.9	1.0498	12298.9	0.939758	12298.4	0.941008	12298.8	0.945559	12298.8	0.938077	12298.5	0.947836	12298.7	0.94724	12299.9	1.0086	12299.6	0.967598
12299.5	0.946281	12299.1	0.946934	12299.1	0.975117	12299.1	0.995972	12299.1	0.941706	12311.1	1.04728	12299.1	0.94107	12298.6	0.94149	12299	0.946998	12299	0.943218	12298.7	0.942884	12298.9	0.951097	12300.1	1.0142	12299.8	0.970363
12299.7	0.949343	12299.3	0.951235	12299.3	0.980002	12299.3	0.999663	12299.3	0.94372	12311.4	1.05047	12299.3	0.943026	12298.8	0.943146	12299.2	0.950937	12299.2	0.942728	12298.9	0.925433	12299.1	0.949288	12300.3	1.01525	12300	0.976771
12299.9	0.950649	12299.5	0.956667	12299.5	0.981188	12299.5	0.999456	12299.5	0.946489	12311.6	1.05334	12299.5	0.94615	12299	0.948603	12299.4	0.954934	12299.4	0.940687	12299.1	0.938041	12299.2	0.956359	12300.5	1.01027	12300.2	0.976915
12300.1	0.953247	12299.7	0.954026	12299.7	0.984271	12299.7	1.00226	12299.7	0.947327	12311.8	1.0521	12299.7	0.953986	12299.2	0.941778	12299.6	0.957165	12299.6	0.942709	12299.3	0.944979	12299.5	0.956656	12300.7	1.01239	12300.4	0.978488
12300.3	0.954103	12299.9	0.959529	12299.9	0.984298	12299.9	1.0052	12299.9	0.951347	12312	1.05473	12299.9	0.952135	12299.4	0.9462	12299.8	0.962258	12299.8	0.947692	12299.5	0.951461	12299.6	0.956723	12300.9	1.00868	12300.6	0.978625
12300.5	0.95679	12300.1	0.960833	12300.1	0.988758	12300.1	1.00741	12300.1	0.955319	12312.2	1.05108	12300.1	0.948854	12299.7	0.952541	12300	0.959474	12300	0.949856	12299.7	0.950036	12299.9	0.961413	12301.1	1.02348	12300.8	0.982416
12300.7	0.95923	12300.3	0.962544	12300.3	0.98912	12300.3	1.0097	12300.3	0.955541	12312.4	1.05342	12300.3	0.953727	12299.9	0.957106	12300.2	0.961273	12300.2	0.951308	12299.9	0.953487	12300.1	0.96767	12301.3	1.02009	12301	0.988388
12300.9	0.9578	12300.5	0.965173	12300.5	0.990186	12300.5	1.01126	12300.5	0.956224	12312.6	1.05592	12300.5	0.961477	12300.1	0.958843	12300.5	0.965301	12300.4	0.957307	12300.1	0.954226	12300.3	0.967703	12301.5	1.02141	12301.2	0.990591
12301.1	0.960477	12300.7	0.964602	12300.7	0.991652	12300.7	1.01055	12300.7	0.959919	12312.8	1.05416	12300.7	0.958957	12300.2	0.9612	12300.6	0.969018	12300.6	0.955631	12300.3	0.96012	12300.5	0.971228	12301.8	1.02207	12301.4	0.992916
12301.3	0.964502	12300.9	0.97075	12300.9	0.993558	12300.9	1.01323	12300.9	0.960387	12313	1.05616	12300.9	0.962681	12300.5	0.9617	12300.8	0.971154	12300.8	0.958239	12300.5	0.954271	12300.7	0.972033	12302	1.02718	12301.6	0.994854
12301.5	0.962963	12301.1	0.975259	12301.1	0.996094	12301.1	1.01343	12301.1	0.960541	12313.2	1.05561	12301.1	0.968324	12300.6	0.957833	12301	0.972762	12301	0.962234	12300.7	0.958515	12300.9	0.973855	12302.2	1.01835	12301.8	0.995785
12301.8	0.964546	12301.3	0.974829	12301.3	0.996416	12301.3	1.01336	12301.3	0.964769	12313.4	1.06098	12301.4	0.970787	12300.8	0.96052	12301.3	0.975985	12301.2	0.964066	12300.9	0.96122	12301.1	0.97724	12302.3	1.02555	12302	0.999666
12302	0.970537	12301.5	0.973091	12301.5	0.999509	12301.5	1.0172	12301.5	0.966547	12313.6	1.06141	12301.6	0.969591	12301.1	0.969592	12301.5	0.97488	12301.4	0.962781	12301.1	0.958232	12301.3	0.975064	12302.5	1.03116	12302.3	1.00338
12302.2	0.971652	12301.8	0.980478	12301.8	1.00101	12301.8	1.01861	12301.8	0.968383	12313.8	1.05965	12301.8	0.973875	12301.3	0.976115	12301.7	0.977195	12301.6	0.96716	12301.3	0.961095	12301.5	0.978436	12302.7	1.02654	12302.5	1.0061
12302.4	0.975914	12302	0.98545	12302	0.997436	12302	1.02093	12302	0.971514	12314	1.05834	12302	0.97425	12301.5	0.971133	12301.9	0.98125	12301.9	0.969672	12301.5	0.965458	12301.7	0.977935	12302.9	1.03042	12302.7	1.00883
12302.5	0.980159	12302.2	0.984551	12302.2	1.00418	12302.2	1.02114	12302.2	0.974566	12314.2	1.05901	12302.2	0.9797	12301.7	0.974495	12302.1	0.982957	12302	0.971495	12301.7	0.967442	12301.9	0.981982	12303.1	1.0336	12302.9	1.01171
12302.7	0.981505	12302.4	0.98641	12302.4	1.0009	12302.4	1.02105	12302.4	0.973826	12314.4	1.06136	12302.4	0.974426	12301.9	0.976969	12302.3	0.987258	12302.2	0.974578	12301.9	0.978114	12302.1	0.985086	12303.4	1.0363	12303	1.01323
12302.9	0.981316	12302.5	0.985617	12302.5	1.00718	12302.5	1.0238	12302.5	0.976682	12314.6	1.06264	12302.6	0.98009	12302.1	0.984202	12302.5	0.985691	12302.4	0.97671	12302.1	0.976284	12302.3	0.987487	12303.5	1.03334	12303.2	1.0107
12303.1	0.98636	12302.7	0.985831	12302.7	1.00898	12302.7	1.02487	12302.7	0.978064	12314.9	1.06102	12302.8	0.982269	12302.3	0.983148	12302.7	0.984057	12302.6	0.977739	12302.3	0.983304	12302.5	0.991381	12303.7	1.0288	12303.5	1.01336
12303.4	0.992126	12302.9	0.990247	12302.9	1.00886	12302.9	1.02484	12302.9	0.981244	12315.1	1.06496	12303	0.981095	12302.5	0.978011	12302.9	0.990173	12302.9	0.978706	12302.5	0.983898	12302.7	0.990095	12303.9	1.03429	12303.6	1.02153
12303.6	0.99016	12303.1	0.99188	12303.1	1.01019	12303.1	1.02638	12303.1	0.983392	12315.3	1.06585	12303.2	0.984071	12302.7	0.985046	12303.1	0.990012	12303	0.982228	12302.7	0.972832	12302.9	0.989383	12304.1	1.03305	12303.9	1.01316
12303.8	0.987568	12303.4	0.993381	12303.4	1.01562	12303.4	1.0297	12303.4	0.984803	12315.5	1.06642	12303.4	0.985317	12302.9	0.994765	12303.3	0.991628	12303.2	0.985364	12302.9	0.966283	12303.1	0.989092	12304.3	1.03472	12304.1	1.0198
12303.9	0.988434	12303.6	0.992479	12303.6	1.01653	12303.6	1.02821	12303.6	0.984607	12315.7	1.06607	12303.6	0.986852	12303.1	0.984811	12303.5	0.99435	12303.5	0.983617	12303.1	0.975219	12303.3	0.991603	12304.5	1.03608	12304.2	1.02449
12304.1	0.989947	12303.8	0.996894	12303.8	1.01564	12303.8	1.02721	12303.8	0.987352	12315.9	1.0668	12303.8	0.989586	12303.3	0.993339	12303.7	0.993525	12303.6	0.986866	12303.3	0.989193	12303.5	0.994785	12304.7	1.03497	12304.4	1.02007
12304.3	0.993127	12303.9	0.998217	12303.9	1.01563	12303.9	1.02829	12303.9	0.990185	12316.1	1.06648	12303.9	0.988366	12303.5	0.99168	12303.8	0.997749	12303.8	0.99168	12303.5	0.992397	12303.7	0.996699	12304.9	1.03768	12304.6	1.02206
12304.5	1.00178	12304.1	0.998285	12304.1	1.0184	12304.1	1.02788	12304.1	0.990946	12316.2	1.0686	12304.1	0.988605	12303.7	0.993502	12304	0.999716	12304	0.987201	12303.7	0.994564	12303.9	0.997833	12305.1	1.03177	12304.8	1.02692
12304.7	0.999894	12304.3	1.00308	12304.3	1.01655	12304.3	1.02936	12304.3	0.993603	12316.5	1.06791	12304.3	0.997423	12303.9	0.99106	12304.2	0.999219	12304.2	0.988622	12303.9	0.988804	12304	0.996213	12305.3	1.0344	12305	1.02615
12304.9	0.997794	12304.5	1.00365	12304.5	1.01898	12304.5	1.03276	12304.5	0.995718	12316.7	1.06624	12304.5	0.998492	12304	0.994432	12304.4	1.00193	12304.4	0.993507	12304.1	0.990573	12304.2	1.00017	12305.5	1.03342	12305.2	1.03271
12305.1	1.00221	12304.7	1.00353	12304.7	1.01872	12304.7	1.03128	12304.7	0.998616	12316.9	1.06992	12304.7	0.999986	12304.2	1.00194	12304.6	1.00445	12304.6	0.996159	12304.3	1.00063	12304.4	1.00665	12305.7	1.03941	12305.4	1.0317
12305.3	1.00378	12304.9	1.00385	12304.9	1.02239	12304.9	1.03083	12304.9	0.999614	12317	1.07228	12304.9	1.00463	12304.4	1.00478	12304.8	1.00764	12304.8	0.9957	12304.5	1.00502	12304.6	1.00295	12305.9	1.0403	12305.6	1.03436
12305.5	1.00385	12305.1	1.00939	12305.1	1.01924	12305.1	1.03089	12305.1	1.00174	12317.2	1.06966	12305.1	1.00135	12304.6	1.0014	12305	1.00817	12305	0.999137	12304.7	1.00878	12304.8	1.00574	12306.1	1.03996	12305.8	1.02931
12305.7	1.0046	12305.3	1.00765	12305.3	1.02307	12305.3	1.0302	12305.3	1.0042	12317.4	1.07059	12305.3	1.00357	12304.8	1.00472	12305.2	1.00671	12305.2	1.00022	12304.9	1.00426	12305	1.01355	12306.3	1.04245	12305.9	1.03433
12305.9	1.0054	12305.5	1.00763	12305.5	1.02192	12305.5	1.03119	12305.5	1.00486	12317.6	1.06914	12305.5	1.00871	12305	1.00125	12305.4	1.0075	12305.4	1.00356	12305.1	1.00502	12305.2	1.01019	12306.5	1.03491	12306.1	1.03173
12306.1	1.01332	12305.7	1.01481	12305.7	1.02812	12305.7	1.03632	12305.7	1.00624	12317.8	1.0708	12305.7	1.00999	12305.2	1.00801	12305.6	1.01045	12305.6	1.00318	12305.3	1.0068	12305.4	1.01291	12306.7	1.04027	12306.3	1.03801
12306.3	1.0138	12305.9	1.01339	12305.9	1.02978	12305.9	1.03463	12305.9	1.00798	12318	1.07035	12305.9	1.00882	12305.4	1.00881	12305.8	1.01197	12305.7	1.00863	12305.5	1.00233	12305.6	1.01261	12306.9	1.03898	12306.5	1.03653
12306.5	1.01216	12306.1	1.01169	12306.1	1.02708	12306.1	1.03344	12306.1	1.01015	12318.2	1.07066	12306.1	1.01395	12305.6	1.01185	12306	1.01288	12306	1.01095	12305.6	1.0076	12305.8	1.01279	12307.1	1.04009	12306.7	1.03915
12306.7	1.01713	12306.3	1.01275	12306.3	1.02963	12306.3	1.03556	12306.3	1.01066	12318.4	1.07194	12306.3	1.01024	12305.8	1.01455	12306.2	1.01484	12306.1	1.00954	12305.8	1.01338	12306	1.02059	12307.3	1.04191	12306.9	1.04244
12306.9	1.02223	12306.5	1.01899	12306.5	1.03252	12306.5	1.03412	12306.5	1.01519	12318.5	1.07313	12306.5	1.01676	12306	1.01634	12306.4	1.01832	12306.4	1.0108	12306	1.01084	12306.2	1.02379	12307.5	1.0451	12307.1	1.03543
12307.1	1.01627	12306.7	1.01833	12306.7	1.03273	12306.7	1.03751	12306.7	1.018	12318.8	1.07123	12306.7	1.01227	12306.2	1.01696	12306.6	1.01865	12306.6	1.0101	12306.2	1.01382	12306.5	1.02146	12307.7	1.04564	12307.3	1.0394
12307.3	1.02258	12306.9	1.02282	12306.9	1.03289	12306.9	1.03657	12306.9	1.01696	12318.9	1.06986	12306.9	1.01846	12306.4	1.01609	12306.8	1.01913	12306.8	1.01319	12306.5	1.02311	12306.7	1.02063	12307.9	1.04551	12307.5	1.03551
12307.5	1.02799	12307.1	1.01815	12307.1	1.03022	12307.1	1.03744	12307.1	1.01798	12319.1	1.07111	12307.1	1.01967	12306.7	1.01699	12307	1.02274	12307	1.0134	12306.7	1.02256	12306.9	1.02217	12308.1	1.05242	12307.7	1.03992
12307.7	1.02383	12307.3	1.02171	12307.3	1.03846	12307.3	1.03778	12307.3	1.0184	12319.3	1.07171	12307.3	1.02363	12306.9	1.0178	12307.2	1.02218	12307.2	1.0172	12306.9	1.03002	12307.1	1.0244	12308.3	1.05288	12307.9	1.04125
12307.9	1.03032	12307.5	1.02291	12307.5	1.03739	12307.5	1.03786	12307.5	1.02158	12319.5	1.0732	12307.5	1.02587	12307.1	1.02959	12307.4	1.02213	12307.4	1.0159	12307.1	1.02281	12307.3	1.02503	12308.5	1.04477	12308.1	1.04503
12308.1	1.02447	12307.7	1.02679	12307.7	1.03594	12307.7	1.03873	12307.7	1.02332	12319.7	1.07518	12307.7	1.02268	12307.2	1.02832	12307.6	1.02669	12307.6	1.01933	12307.3	1.01872	12307.5	1.02982	12308.7	1.04543	12308.2	1.03838
12308.3	1.02761	12307.9	1.02656	12307.9	1.04128	12307.9	1.04045	12307.9	1.02328	12319.9	1.07649	12307.9	1.02638	12307.5	1.02724	12307.8	1.03013	12307.8	1.02262	12307.5	1.02212	12307.6	1.03523	12308.9	1.04692	12308.5	1.04168
12308.5	1.0307	12308.1	1.02819	12308.1	1.0429	12308.1	1.0423	12308.1	1.02541	12320.1	1.07242	12308.1	1.03024	12307.6	1.03319	12308	1.02979	12308	1.02118	12307.6	1.03039	12307.8	1.03375	12309	1.05169	12308.7	1.03965
12308.7	1.02424	12308.3	1.0274	12308.3	1.03924	12308.3	1.04449	12308.3	1.02822	12320.3	1.07117	12308.3	1.02733	12307.9	1.02933	12308.2	1.02894	12308.2	1.02451	12307.9	1.04244	12308	1.03306	12309.2	1.04331	12308.9	1.04111
12308.9	1.02909	12308.5	1.03056	12308.5	1.03891	12308.5	1.04232	12308.5	1.0295	12320.5	1.07459	12308.5	1.03547	12308.1	1.03678	12308.4	1.02981	12308.4	1.02507	12308.1	1.03585	12308.2	1.03423	12309.5	1.04809	12309.1	1.03922
12309.1	1.03494	12308.7	1.02912	12308.7	1.04062	12308.7	1.04229	12308.7	1.03214	12320.7	1.07248	12308.7	1.03121	12308.2	1.03126	12308.6	1.03433	12308.6	1.03138	12308.3	1.03452	12308.4	1.03603	12309.7	1.05378	12309.2	1.03985
12309.3	1.03858	12308.9	1.03217	12308.9	1.04452	12308.9	1.04488	12308.9	1.03202	12320.9	1.07346	12308.9	1.03311	12308.4	1.03372	12308.8	1.03748	12308.8	1.02865	12308.5	1.01909	12308.6	1.03691	12309.9	1.04932	12309.4	1.04133
12309.5	1.04095	12309.1	1.03231	12309.1	1.04261	12309.1	1.04529	12309.1	1.03267	12321.1	1.07296	12309.1	1.03239	12308.6	1.0366	12309	1.03614	12309	1.03356	12308.7	1.02065	12308.8	1.03307	12310.1	1.05657	12309.6	1.03867
12309.7	1.03942	12309.3	1.03562	12309.3	1.04574	12309.3	1.04177	12309.3	1.0354	12321.3	1.07343	12309.3	1.03152	12308.8	1.03637	12309.2	1.03831	12309.2	1.0355	12308.9	1.03082	12309	1.03515	12310.3	1.05299	12309.8	1.04167
12309.9	1.04067	12309.5	1.04128	12309.5	1.04421	12309.5	1.04469	12309.5	1.0381	12321.5	1.07286	12309.5	1.03927	12309	1.03344	12309.4	1.03838	12309.4	1.03668	12309	1.02657	12309.2	1.03809	12310.5	1.04618	12310	1.04767
12310.1	1.03974	12309.7	1.04271	12309.7	1.04282	12309.7	1.04714	12309.7	1.03819	12321.7	1.07508	12309.7	1.04092	12309.2	1.0401	12309.6	1.03789	12309.6	1.03659	12309.2	1.02898	12309.5	1.03808	12310.7	1.05711	12310.2	1.04737
12310.4	1.0423	12309.9	1.04145	12309.9	1.04402	12309.9	1.04671	12309.9	1.04084	12321.9	1.07639	12310	1.0392	12309.4	1.04767	12309.9	1.0403	12309.8	1.03901	12309.5	1.03496	12309.7	1.03925	12310.9	1.0569	12310.4	1.04581
12310.5	1.04996	12310.1	1.04054	12310.1	1.04678	12310.1	1.04632	12310.1	1.04082	12322.1	1.07586	12310.2	1.04332	12309.6	1.04289	12310.1	1.03777	12310	1.03657	12309.7	1.03287	12309.9	1.04134	12311.2	1.04783	12310.6	1.04074
12310.8	1.05214	12310.4	1.04017	12310.4	1.04567	12310.4	1.04564	12310.4	1.04396	12322.2	1.07275	12310.4	1.04195	12309.9	1.04282	12310.3	1.04087	12310.2	1.03993	12309.9	1.03938	12310.1	1.04634	12311.4	1.05007	12310.8	1.03928
12311	1.04835	12310.5	1.04007	12310.5	1.04851	12310.5	1.04818	12310.5	1.04724	12322.4	1.07151	12310.6	1.04785	12310.1	1.04313	12310.5	1.04344	12310.4	1.04706	12310.1	1.04726	12310.3	1.04708	12311.6	1.0548	12311	1.04795
12311.2	1.05228	12310.8	1.04002	12310.8	1.04588	12310.8	1.0477	12310.8	1.04719	12322.6	1.0699	12310.8	1.04728	12310.3	1.04208	12310.7	1.04277	12310.6	1.0419	12310.3	1.04522	12310.5	1.04571	12311.8	1.05236	12311.2	1.04572
12311.4	1.04937	12311	1.04186	12311	1.04946	12311	1.04716	12311	1.04369	12322.8	1.06938	12311	1.05343	12310.5	1.046	12310.9	1.04768	12310.8	1.04344	12310.5	1.05319	12310.7	1.04604	12312	1.05495	12311.4	1.04515
12311.6	1.05322	12311.2	1.04425	12311.2	1.04927	12311.2	1.047	12311.2	1.04564	12323.1	1.06766	12311.2	1.04811	12310.7	1.04481	12311.1	1.0504	12311	1.04842	12310.7	1.04381	12310.9	1.04503	12312.2	1.05061	12311.6	1.04734
12311.9	1.0566	12311.4	1.04717	12311.4	1.05253	12311.4	1.05023	12311.4	1.05119	12323.3	1.06968	12311.4	1.04838	12310.9	1.05117	12311.3	1.04696	12311.2	1.04878	12310.9	1.0441	12311.1	1.0448	12312.4	1.05092	12311.8	1.05009
12312	1.05704	12311.6	1.04691	12311.6	1.04667	12311.6	1.04983	12311.6	1.05303	12323.5	1.06798	12311.6	1.05123	12311.1	1.05377	12311.5	1.04799	12311.5	1.04835	12311.1	1.05488	12311.4	1.04747	12312.6	1.05111	12312	1.04912
12312.2	1.05221	12311.9	1.04553	12311.9	1.04546	12311.9	1.05221	12311.9	1.05459	12323.7	1.06787	12311.9	1.05041	12311.4	1.05089	12311.7	1.04958	12311.7	1.04959	12311.4	1.05509	12311.6	1.04872	12312.8	1.05169	12312.3	1.0481
12312.5	1.05798	12312	1.04706	12312	1.04738	12312	1.051	12312	1.05501	12323.9	1.07151	12312.1	1.05279	12311.6	1.05283	12312	1.0545	12311.9	1.05469	12311.6	1.04212	12311.8	1.04947	12313	1.05034	12312.5	1.04881
12312.6	1.05327	12312.2	1.04897	12312.2	1.05078	12312.2	1.0511	12312.2	1.05677	12324.1	1.07189	12312.3	1.05586	12311.8	1.05194	12312.2	1.05513	12312.1	1.05284	12311.8	1.05107	12312	1.05285	12313.2	1.04965	12312.7	1.04958
12312.9	1.05743	12312.5	1.04861	12312.5	1.0514	12312.5	1.05131	12312.5	1.05816	12324.3	1.06797	12312.5	1.05156	12312	1.05555	12312.4	1.05175	12312.3	1.05154	12312	1.05066	12312.2	1.05342	12313.5	1.05433	12312.9	1.04923
12313	1.05764	12312.6	1.04776	12312.6	1.04713	12312.6	1.04805	12312.6	1.05973	12324.5	1.07014	12312.6	1.05547	12312.2	1.05352	12312.5	1.05107	12312.5	1.05352	12312.2	1.06031	12312.4	1.05268	12313.7	1.04792	12313.1	1.04684
12313.3	1.05919	12312.9	1.04891	12312.9	1.05198	12312.9	1.05064	12312.9	1.05999	12324.8	1.06822	12312.9	1.05637	12312.4	1.05934	12312.8	1.05327	12312.7	1.05527	12312.4	1.06154	12312.6	1.05383	12313.9	1.04356	12313.3	1.05241
12313.5	1.05749	12313	1.05018	12313	1.05178	12313	1.0501	12313	1.05977	12325	1.06957	12313.1	1.05664	12312.6	1.05336	12313	1.05743	12312.9	1.06123	12312.6	1.06137	12312.8	1.05189	12314.1	1.04823	12313.5	1.0536
12313.7	1.06061	12313.3	1.05007	12313.3	1.04844	12313.3	1.04923	12313.3	1.06056	12325.2	1.07038	12313.3	1.05298	12312.8	1.05524	12313.2	1.05829	12313.1	1.05862	12312.8	1.07022	12313	1.05149	12314.2	1.04987	12313.7	1.05187
12313.9	1.05799	12313.5	1.05464	12313.5	1.05086	12313.5	1.05019	12313.5	1.06229	12325.4	1.06699	12313.5	1.0572	12313	1.06001	12313.4	1.05602	12313.3	1.05898	12313	1.06486	12313.2	1.05682	12314.5	1.04323	12313.9	1.04955
12314.1	1.05931	12313.7	1.05506	12313.7	1.0527	12313.7	1.04958	12313.7	1.06364	12325.6	1.06671	12313.7	1.05569	12313.2	1.05964	12313.6	1.05732	12313.5	1.05994	12313.2	1.05872	12313.4	1.0566	12314.7	1.04513	12314.1	1.05337
12314.3	1.06011	12313.9	1.05777	12313.9	1.0521	12313.9	1.04848	12313.9	1.06421	12325.8	1.06967	12313.9	1.05737	12313.4	1.05838	12313.8	1.06041	12313.8	1.06134	12313.5	1.05674	12313.6	1.05313	12314.9	1.04898	12314.3	1.05325
12314.5	1.06065	12314.1	1.05703	12314.1	1.05242	12314.1	1.04904	12314.1	1.06291	12326	1.06712	12314.1	1.06101	12313.6	1.06195	12314	1.05878	12313.9	1.06032	12313.7	1.05327	12313.8	1.05797	12315.1	1.05235	12314.5	1.05482
12314.7	1.06084	12314.3	1.05559	12314.3	1.05024	12314.3	1.04853	12314.3	1.06479	12326.1	1.06635	12314.3	1.05705	12313.8	1.05975	12314.2	1.05339	12314.1	1.06556	12313.9	1.06139	12314	1.05559	12315.3	1.04486	12314.7	1.04792
12314.9	1.05929	12314.5	1.05443	12314.5	1.04926	12314.5	1.04702	12314.5	1.06567	12326.4	1.06608	12314.5	1.06027	12314	1.06127	12314.4	1.05364	12314.3	1.06573	12314	1.06589	12314.2	1.05613	12315.5	1.04018	12314.9	1.05628
12315.1	1.06229	12314.7	1.05381	12314.7	1.04925	12314.7	1.04813	12314.7	1.06862	12326.6	1.06463	12314.7	1.05986	12314.2	1.06091	12314.6	1.05328	12314.5	1.06492	12314.2	1.07126	12314.4	1.06442	12315.7	1.04308	12315.1	1.05339
12315.3	1.06366	12314.9	1.05421	12314.9	1.05282	12314.9	1.0487	12314.9	1.07081	12326.8	1.06493	12314.9	1.06351	12314.4	1.06374	12314.8	1.05294	12314.8	1.06755	12314.4	1.06489	12314.7	1.06661	12315.9	1.05251	12315.3	1.05228
12315.5	1.06777	12315.1	1.05732	12315.1	1.05039	12315.1	1.04902	12315.1	1.06981	12327	1.06403	12315.2	1.06386	12314.6	1.06341	12315	1.05925	12315	1.06628	12314.7	1.05158	12314.9	1.06639	12316.1	1.0426	12315.5	1.05228
12315.7	1.06712	12315.3	1.05852	12315.3	1.05449	12315.3	1.04742	12315.3	1.06901	12327.2	1.06394	12315.4	1.06719	12314.9	1.06552	12315.3	1.06102	12315.2	1.06956	12314.9	1.05902	12315.1	1.06551	12316.3	1.03978	12315.8	1.05356
12315.9	1.06526	12315.5	1.06419	12315.5	1.05421	12315.5	1.04939	12315.5	1.07208	12327.4	1.06003	12315.6	1.06713	12315.1	1.06614	12315.5	1.06154	12315.4	1.07111	12315.1	1.05454	12315.3	1.0632	12316.5	1.04252	12316	1.05934
12316.1	1.07206	12315.7	1.05775	12315.7	1.05249	12315.7	1.04964	12315.7	1.07301	12327.6	1.06249	12315.8	1.06705	12315.3	1.06636	12315.6	1.06031	12315.6	1.07121	12315.3	1.06259	12315.5	1.06035	12316.7	1.04319	12316.2	1.05354
12316.3	1.07297	12315.9	1.05671	12315.9	1.0533	12315.9	1.04602	12315.9	1.0734	12327.8	1.06361	12315.9	1.06865	12315.5	1.06827	12315.8	1.05982	12315.8	1.07074	12315.5	1.05965	12315.7	1.05676	12316.9	1.04017	12316.4	1.05753
12316.5	1.06928	12316.1	1.05876	12316.1	1.05011	12316.1	1.04523	12316.1	1.07238	12328	1.06505	12316.1	1.06883	12315.7	1.06787	12316	1.06214	12316	1.07111	12315.7	1.06725	12315.9	1.05678	12317.1	1.04036	12316.5	1.0554
12316.7	1.06509	12316.3	1.06232	12316.3	1.05293	12316.3	1.04562	12316.3	1.07603	12328.2	1.06098	12316.3	1.07396	12315.9	1.06537	12316.2	1.06169	12316.2	1.07276	12315.9	1.06385	12316.1	1.0587	12317.2	1.04237	12316.8	1.05404
12316.9	1.0699	12316.5	1.06196	12316.5	1.05157	12316.5	1.04258	12316.5	1.07616	12328.5	1.05877	12316.5	1.0679	12316.1	1.0656	12316.4	1.06216	12316.4	1.07138	12316.1	1.05139	12316.3	1.06284	12317.4	1.04255	12317	1.05729
12317.1	1.06841	12316.7	1.06229	12316.7	1.0501	12316.7	1.04553	12316.7	1.0774	12328.7	1.05896	12316.7	1.06754	12316.2	1.06796	12316.6	1.06029	12316.6	1.07689	12316.3	1.06549	12316.5	1.06631	12317.6	1.03885	12317.2	1.0551
12317.3	1.06969	12316.9	1.06021	12316.9	1.05052	12316.9	1.04537	12316.9	1.07746	12328.9	1.05958	12316.9	1.06958	12316.5	1.06982	12316.8	1.06124	12316.8	1.07865	12316.5	1.05517	12316.7	1.0672	12317.8	1.03556	12317.4	1.05736
12317.5	1.06969	12317.1	1.05944	12317.1	1.05088	12317.1	1.04549	12317.1	1.07716	12329.1	1.05859	12317.1	1.06914	12316.7	1.0699	12317	1.06409	12317	1.07758	12316.7	1.06878	12316.9	1.06956	12318	1.04167	12317.6	1.05691
12317.6	1.06828	12317.3	1.06383	12317.3	1.04822	12317.3	1.04173	12317.3	1.07645	12329.2	1.05741	12317.3	1.06715	12316.9	1.06742	12317.2	1.06073	12317.1	1.07311	12316.9	1.06166	12317	1.07074	12318.2	1.04184	12317.8	1.05642
12317.8	1.06886	12317.5	1.06145	12317.5	1.04818	12317.5	1.04166	12317.5	1.07926	12329.4	1.05291	12317.5	1.069	12317	1.0661	12317.4	1.06305	12317.3	1.07639	12317.1	1.06154	12317.2	1.06802	12318.4	1.03643	12317.9	1.05514
12318	1.07131	12317.6	1.06301	12317.6	1.05011	12317.6	1.04352	12317.6	1.07971	12329.6	1.05504	12317.6	1.07134	12317.2	1.07146	12317.5	1.06301	12317.5	1.07607	12317.2	1.06962	12317.4	1.06581	12318.6	1.04055	12318.1	1.05947
12318.2	1.07453	12317.8	1.06361	12317.8	1.05254	12317.8	1.04449	12317.8	1.07985	12329.8	1.05527	12317.8	1.0745	12317.4	1.07228	12317.7	1.06375	12317.7	1.07859	12317.4	1.06974	12317.6	1.06937	12318.8	1.03495	12318.3	1.05391
12318.4	1.06902	12318	1.06384	12318	1.05223	12318	1.04371	12318	1.08087	12330	1.05584	12318	1.0684	12317.5	1.06774	12317.9	1.06718	12317.9	1.07638	12317.6	1.06873	12317.8	1.06749	12319	1.03658	12318.5	1.05764
12318.6	1.0714	12318.2	1.06462	12318.2	1.05237	12318.2	1.04392	12318.2	1.08016	12330.2	1.05148	12318.2	1.07069	12317.7	1.06664	12318.1	1.06651	12318.1	1.07902	12317.8	1.06868	12318	1.06944	12319.2	1.04143	12318.7	1.05589
12318.8	1.0705	12318.4	1.06383	12318.4	1.05119	12318.4	1.04208	12318.4	1.07912	12330.4	1.04964	12318.4	1.07315	12318	1.06648	12318.4	1.06149	12318.3	1.07941	12318	1.06594	12318.2	1.07088	12319.4	1.03869	12318.9	1.05944
12319	1.07194	12318.6	1.06681	12318.6	1.05012	12318.6	1.04058	12318.6	1.07985	12330.6	1.04844	12318.6	1.07023	12318.1	1.07275	12318.5	1.06377	12318.5	1.0769	12318.2	1.06891	12318.4	1.06994	12319.6	1.03725	12319.1	1.06052
12319.2	1.0747	12318.8	1.06267	12318.8	1.04657	12318.8	1.0404	12318.8	1.08131	12330.8	1.04875	12318.9	1.06973	12318.4	1.07202	12318.8	1.06749	12318.7	1.08468	12318.4	1.07755	12318.6	1.06572	12319.8	1.03623	12319.3	1.06178
12319.4	1.07231	12319	1.06337	12319	1.04693	12319	1.04233	12319	1.08088	12330.9	1.04719	12319	1.07602	12318.5	1.06974	12318.9	1.06335	12318.9	1.08363	12318.6	1.08482	12318.8	1.06645	12320	1.03476	12319.5	1.06106
12319.6	1.07829	12319.2	1.06502	12319.2	1.04677	12319.2	1.04041	12319.2	1.07949	12331.1	1.0437	12319.2	1.07387	12318.8	1.07126	12319.1	1.06199	12319.1	1.07854	12318.8	1.08666	12319	1.07005	12320.2	1.02919	12319.6	1.05861
12319.8	1.07735	12319.4	1.06264	12319.4	1.04991	12319.4	1.03879	12319.4	1.08196	12331.3	1.04608	12319.4	1.07472	12318.9	1.07352	12319.3	1.06319	12319.2	1.08237	12319	1.07327	12319.1	1.0712	12320.4	1.03245	12319.9	1.05725
12320	1.07082	12319.6	1.06405	12319.6	1.04855	12319.6	1.04201	12319.6	1.08334	12331.5	1.045	12319.6	1.07714	12319.1	1.07204	12319.5	1.06241	12319.4	1.08045	12319.1	1.06791	12319.4	1.06946	12320.6	1.03232	12320.1	1.05573
12320.2	1.07428	12319.8	1.06544	12319.8	1.04808	12319.8	1.04043	12319.8	1.08409	12331.8	1.0453	12319.8	1.07356	12319.3	1.069	12319.7	1.0674	12319.6	1.08138	12319.3	1.07296	12319.5	1.06411	12320.8	1.02961	12320.3	1.05827
12320.4	1.069	12320	1.06677	12320	1.04476	12320	1.0401	12320	1.08354	12331.9	1.04315	12320	1.07263	12319.5	1.0712	12319.9	1.0677	12319.8	1.08182	12319.5	1.07108	12319.8	1.06915	12320.9	1.03561	12320.5	1.05412
12320.6	1.06972	12320.2	1.06907	12320.2	1.04257	12320.2	1.04015	12320.2	1.08366	12332.1	1.04252	12320.2	1.07653	12319.7	1.07418	12320.1	1.06519	12320	1.08301	12319.8	1.07429	12320	1.07656	12321.1	1.02984	12320.7	1.05947
12320.8	1.07281	12320.4	1.06727	12320.4	1.04638	12320.4	1.04101	12320.4	1.08227	12332.3	1.04009	12320.4	1.07629	12319.9	1.07487	12320.3	1.06887	12320.3	1.08196	12320	1.08014	12320.2	1.07364	12321.3	1.03001	12320.9	1.05822
12321	1.06982	12320.6	1.06633	12320.6	1.04691	12320.6	1.03962	12320.6	1.08017	12332.5	1.04072	12320.6	1.0841	12320.1	1.07087	12320.5	1.06909	12320.4	1.08664	12320.2	1.07519	12320.4	1.06515	12321.5	1.03443	12321.1	1.05879
12321.1	1.06807	12320.8	1.06414	12320.8	1.04795	12320.8	1.03926	12320.8	1.0825	12332.7	1.03529	12320.8	1.07898	12320.3	1.06941	12320.7	1.06659	12320.6	1.08377	12320.4	1.07535	12320.5	1.06676	12321.7	1.02992	12321.2	1.06131
12321.3	1.07152	12321	1.06563	12321	1.04495	12321	1.03848	12321	1.08274	12332.9	1.03411	12321	1.06951	12320.5	1.06969	12320.9	1.0647	12320.8	1.08147	12320.5	1.06825	12320.7	1.06886	12321.9	1.03288	12321.4	1.05448
12321.6	1.07516	12321.1	1.06715	12321.1	1.04266	12321.1	1.03652	12321.1	1.08194	12333.2	1.03335	12321.2	1.07064	12320.7	1.06938	12321.1	1.0618	12321	1.08191	12320.7	1.08144	12320.9	1.06841	12322.1	1.03066	12321.6	1.05713
12321.7	1.0761	12321.3	1.06648	12321.3	1.04364	12321.3	1.03608	12321.3	1.08395	12333.4	1.03628	12321.4	1.0776	12320.9	1.07265	12321.3	1.05851	12321.2	1.08308	12320.9	1.06699	12321.1	1.07001	12322.3	1.03176	12321.8	1.05822
12321.9	1.06946	12321.6	1.06619	12321.6	1.04723	12321.6	1.03865	12321.6	1.08272	12333.6	1.03253	12321.6	1.07538	12321.1	1.07639	12321.5	1.0616	12321.4	1.08033	12321.1	1.06489	12321.3	1.0698	12322.5	1.02712	12322	1.05696
12322.1	1.07501	12321.7	1.06757	12321.7	1.04244	12321.7	1.03709	12321.7	1.08139	12333.8	1.02724	12321.8	1.07251	12321.3	1.07364	12321.7	1.06447	12321.6	1.07854	12321.3	1.06327	12321.5	1.06774	12322.7	1.026	12322.2	1.05654
12322.3	1.07475	12321.9	1.06882	12321.9	1.04232	12321.9	1.03531	12321.9	1.08161	12334	1.0285	12322	1.07741	12321.5	1.06778	12321.9	1.06409	12321.8	1.08206	12321.5	1.0716	12321.7	1.06787	12322.9	1.02751	12322.4	1.05362
12322.5	1.07351	12322.1	1.06627	12322.1	1.04364	12322.1	1.03623	12322.1	1.08158	12334.1	1.02831	12322.1	1.07435	12321.7	1.07423	12322	1.06502	12322	1.08353	12321.7	1.06758	12321.9	1.06814	12323.1	1.02862	12322.6	1.05326
12322.7	1.07539	12322.3	1.06873	12322.3	1.04172	12322.3	1.03523	12322.3	1.08293	12334.3	1.02609	12322.3	1.07398	12321.9	1.07241	12322.2	1.06425	12322.2	1.08622	12321.9	1.07615	12322.1	1.06989	12323.3	1.02548	12322.8	1.0548
12322.9	1.06345	12322.5	1.06869	12322.5	1.04533	12322.5	1.03386	12322.5	1.08263	12334.5	1.0251	12322.5	1.07164	12322.1	1.07257	12322.4	1.06851	12322.4	1.08265	12322.1	1.07142	12322.3	1.07026	12323.5	1.0212	12323	1.06129
12323.1	1.07136	12322.7	1.06585	12322.7	1.04424	12322.7	1.0335	12322.7	1.08159	12334.7	1.02655	12322.7	1.07838	12322.2	1.06994	12322.6	1.0654	12322.5	1.0792	12322.3	1.07402	12322.5	1.06957	12323.7	1.02382	12323.2	1.05525
12323.3	1.06977	12322.9	1.06183	12322.9	1.04054	12322.9	1.03174	12322.9	1.08091	12334.9	1.02953	12322.9	1.07333	12322.4	1.07382	12322.8	1.06249	12322.8	1.08469	12322.5	1.07327	12322.6	1.06527	12323.9	1.02519	12323.4	1.05182
12323.5	1.07162	12323.1	1.0612	12323.1	1.04004	12323.1	1.03375	12323.1	1.07923	12335.1	1.03051	12323.1	1.07442	12322.6	1.06763	12323	1.06328	12323	1.07769	12322.7	1.07179	12322.9	1.06821	12324.2	1.02114	12323.6	1.05748
12323.8	1.06962	12323.3	1.05968	12323.3	1.04008	12323.3	1.03157	12323.3	1.07794	12335.3	1.02907	12323.4	1.07618	12322.8	1.06755	12323.3	1.06481	12323.2	1.07564	12322.9	1.07828	12323.1	1.07296	12324.4	1.02401	12323.8	1.05676
12324	1.06702	12323.5	1.06201	12323.5	1.04136	12323.5	1.03012	12323.5	1.07851	12335.5	1.02392	12323.6	1.0693	12323	1.06978	12323.5	1.06548	12323.4	1.07925	12323.1	1.05636	12323.3	1.06738	12324.6	1.01876	12324	1.05594
12324.1	1.07035	12323.8	1.06341	12323.8	1.03999	12323.8	1.03043	12323.8	1.08012	12335.7	1.02111	12323.8	1.07139	12323.3	1.06239	12323.6	1.06355	12323.6	1.0802	12323.3	1.06704	12323.5	1.06339	12324.8	1.02029	12324.2	1.05254
12324.4	1.07165	12324	1.06377	12324	1.03697	12324	1.0292	12324	1.08065	12336	1.02209	12324	1.07149	12323.5	1.07486	12323.9	1.06	12323.8	1.07561	12323.5	1.0641	12323.7	1.06491	12325	1.01899	12324.4	1.04398
12324.6	1.06511	12324.1	1.06078	12324.1	1.04036	12324.1	1.02974	12324.1	1.07878	12336.2	1.02149	12324.2	1.07139	12323.7	1.07355	12324.1	1.05939	12324	1.07835	12323.7	1.07059	12323.9	1.06362	12325.2	1.02561	12324.6	1.05725
12324.8	1.07071	12324.4	1.06516	12324.4	1.0388	12324.4	1.02858	12324.4	1.07857	12336.4	1.01767	12324.4	1.07172	12323.9	1.07203	12324.3	1.05872	12324.2	1.07548	12323.9	1.05802	12324.1	1.06302	12325.4	1.02587	12324.9	1.05424
12325	1.07244	12324.6	1.06258	12324.6	1.03979	12324.6	1.02816	12324.6	1.08095	12336.6	1.02012	12324.6	1.07447	12324.1	1.06728	12324.5	1.06131	12324.4	1.07804	12324.1	1.05987	12324.3	1.07323	12325.6	1.0256	12325.1	1.05501
12325.2	1.06904	12324.8	1.06146	12324.8	1.03558	12324.8	1.02912	12324.8	1.08117	12336.8	1.0206	12324.8	1.06606	12324.3	1.07025	12324.7	1.06316	12324.6	1.07707	12324.3	1.07724	12324.5	1.0737	12325.8	1.02022	12325.3	1.05138
12325.4	1.06869	12325	1.06209	12325	1.03609	12325	1.02636	12325	1.07902	12337.1	1.01605	12325	1.06927	12324.5	1.06927	12324.9	1.06088	12324.9	1.07367	12324.5	1.06442	12324.8	1.06432	12326	1.02249	12325.5	1.05483
12325.6	1.06921	12325.2	1.06291	12325.2	1.03824	12325.2	1.02728	12325.2	1.07528	12337.3	1.01674	12325.2	1.06305	12324.7	1.07177	12325.1	1.06039	12325.1	1.07912	12324.8	1.0569	12325	1.0607	12326.2	1.0193	12325.7	1.05392
12325.8	1.07293	12325.4	1.05929	12325.4	1.03694	12325.4	1.02685	12325.4	1.07515	12337.5	1.01655	12325.4	1.06232	12325	1.07217	12325.3	1.06046	12325.3	1.07621	12325	1.06722	12325.2	1.0649	12326.4	1.01902	12326	1.04393
12326	1.06584	12325.6	1.06346	12325.6	1.03557	12325.6	1.02581	12325.6	1.07539	12337.7	1.01522	12325.6	1.06733	12325.1	1.06923	12325.5	1.05699	12325.5	1.07306	12325.2	1.06745	12325.4	1.06104	12326.6	1.02051	12326.1	1.04905
12326.2	1.06071	12325.8	1.06076	12325.8	1.03654	12325.8	1.02364	12325.8	1.0741	12337.9	1.01295	12325.8	1.06501	12325.4	1.07031	12325.7	1.0584	12325.7	1.07303	12325.4	1.07626	12325.6	1.06316	12326.8	1.0205	12326.3	1.05245
12326.4	1.06573	12326	1.06093	12326	1.03539	12326	1.02453	12326	1.07401	12338.1	1.01462	12326	1.07145	12325.5	1.06588	12325.9	1.05647	12325.9	1.07276	12325.6	1.07022	12325.8	1.06617	12327	1.01696	12326.5	1.04843
12326.6	1.06698	12326.2	1.05767	12326.2	1.03568	12326.2	1.02617	12326.2	1.0716	12338.3	1.01675	12326.2	1.06688	12325.7	1.06384	12326.1	1.05509	12326.1	1.07276	12325.8	1.066	12326	1.07095	12327.2	1.01532	12326.8	1.04666
12326.8	1.06311	12326.4	1.05772	12326.4	1.03368	12326.4	1.02624	12326.4	1.07147	12338.6	1.01308	12326.4	1.06481	12325.9	1.06157	12326.3	1.05524	12326.2	1.06983	12326	1.06877	12326.1	1.0657	12327.4	1.01518	12327	1.04979
12327	1.06291	12326.6	1.05736	12326.6	1.03221	12326.6	1.02632	12326.6	1.07185	12338.8	1.0112	12326.6	1.06652	12326.1	1.06116	12326.5	1.05522	12326.5	1.07171	12326.2	1.06315	12326.4	1.06277	12327.6	1.01442	12327.2	1.04365
12327.2	1.0617	12326.8	1.06172	12326.8	1.02893	12326.8	1.02385	12326.8	1.07057	12339	1.0088	12326.9	1.06379	12326.3	1.06481	12326.8	1.05479	12326.7	1.06944	12326.4	1.05333	12326.6	1.0632	12327.8	1.01835	12327.4	1.05115
12327.4	1.05741	12327	1.05629	12327	1.02787	12327	1.02369	12327	1.06929	12339.2	1.00594	12327.1	1.06428	12326.5	1.06612	12327	1.0526	12326.9	1.06941	12326.6	1.06243	12326.8	1.05883	12328.1	1.01909	12327.6	1.04434
12327.6	1.05833	12327.2	1.05784	12327.2	1.03022	12327.2	1.02244	12327.2	1.06978	12339.4	1.00694	12327.3	1.06459	12326.8	1.06575	12327.2	1.05566	12327.1	1.06725	12326.8	1.06548	12327	1.06229	12328.3	1.01711	12327.8	1.04729
12327.9	1.05971	12327.4	1.05779	12327.4	1.03189	12327.4	1.02364	12327.4	1.06763	12339.6	1.00773	12327.5	1.06446	12327	1.06173	12327.4	1.05542	12327.3	1.07001	12327	1.07025	12327.2	1.06146	12328.5	1.00893	12328	1.0467
12328.1	1.05751	12327.6	1.05308	12327.6	1.03228	12327.6	1.02082	12327.6	1.06621	12339.8	1.00656	12327.7	1.06118	12327.2	1.06539	12327.6	1.05204	12327.5	1.06879	12327.2	1.06338	12327.4	1.06189	12328.7	1.01061	12328.2	1.04742
12328.3	1.05635	12327.9	1.05233	12327.9	1.03129	12327.9	1.02247	12327.9	1.06795	12340	1.00238	12327.9	1.06163	12327.4	1.06394	12327.8	1.04635	12327.7	1.06283	12327.4	1.06916	12327.6	1.05641	12328.9	1.01758	12328.4	1.04976
12328.5	1.05349	12328.1	1.05009	12328.1	1.02577	12328.1	1.02059	12328.1	1.06752	12340.2	1.00503	12328.1	1.06318	12327.6	1.06365	12328	1.04557	12327.9	1.06072	12327.6	1.07577	12327.8	1.05558	12329.1	1.01335	12328.7	1.04734
12328.7	1.05424	12328.3	1.05277	12328.3	1.02813	12328.3	1.02132	12328.3	1.06441	12340.5	1.00341	12328.3	1.05932	12327.8	1.06157	12328.2	1.04853	12328.1	1.0616	12327.8	1.06694	12328	1.05399	12329.3	1.01018	12328.9	1.04386
12328.9	1.05431	12328.5	1.04992	12328.5	1.02699	12328.5	1.02115	12328.5	1.06332	12340.7	1.00305	12328.5	1.05867	12328	1.0577	12328.4	1.05091	12328.4	1.0686	12328	1.05973	12328.3	1.054	12329.5	1.01613	12329.1	1.04703
12329.1	1.04988	12328.7	1.05258	12328.7	1.02304	12328.7	1.01806	12328.7	1.06275	12340.9	1.00188	12328.7	1.06274	12328.2	1.05881	12328.6	1.05232	12328.6	1.06328	12328.3	1.07211	12328.5	1.05943	12329.6	1.00964	12329.3	1.04267
12329.3	1.05408	12328.9	1.04984	12328.9	1.0251	12328.9	1.02094	12328.9	1.06227	12341.1	1.00249	12328.9	1.05905	12328.4	1.05754	12328.8	1.05056	12328.8	1.06304	12328.5	1.06912	12328.7	1.05787	12329.9	1.01237	12329.5	1.04114
12329.5	1.05166	12329.1	1.04883	12329.1	1.02187	12329.1	1.02145	12329.1	1.06204	12341.3	1.00203	12329.1	1.05304	12328.7	1.05403	12329	1.04925	12329	1.05369	12328.7	1.05792	12328.9	1.05524	12330	1.01922	12329.7	1.0382
12329.7	1.05044	12329.3	1.04824	12329.3	1.02332	12329.3	1.01811	12329.3	1.05897	12341.5	1.0019	12329.3	1.055	12328.9	1.0539	12329.2	1.0439	12329.1	1.06062	12328.9	1.04856	12329.1	1.04284	12330.2	1.01759	12329.9	1.03983
12329.9	1.04991	12329.5	1.04708	12329.5	1.02368	12329.5	1.02014	12329.5	1.05898	12341.7	1.00378	12329.5	1.06041	12329	1.05593	12329.4	1.04682	12329.3	1.05539	12329.1	1.05708	12329.2	1.04919	12330.4	1.01698	12330.1	1.03428
12330.1	1.05611	12329.7	1.04582	12329.7	1.01956	12329.7	1.01933	12329.7	1.05809	12342	0.997758	12329.7	1.05089	12329.2	1.05063	12329.6	1.04316	12329.5	1.05677	12329.3	1.05091	12329.4	1.05345	12330.6	1.01489	12330.3	1.04387
12330.3	1.05193	12329.9	1.04683	12329.9	1.02293	12329.9	1.01943	12329.9	1.05419	12342.2	0.997701	12329.9	1.05515	12329.4	1.0546	12329.8	1.04141	12329.7	1.05639	12329.4	1.05798	12329.6	1.04743	12330.8	1.00895	12330.5	1.03613
12330.5	1.04953	12330.1	1.04522	12330.1	1.02076	12330.1	1.01989	12330.1	1.05471	12342.4	1.00119	12330.1	1.05325	12329.6	1.05382	12330	1.04365	12329.9	1.05638	12329.6	1.05053	12329.8	1.04791	12331	1.00821	12330.7	1.04077
12330.6	1.04996	12330.3	1.04336	12330.3	1.02261	12330.3	1.02023	12330.3	1.05266	12342.6	0.998764	12330.3	1.04983	12329.8	1.05388	12330.2	1.04112	12330.1	1.05389	12329.8	1.04716	12330	1.05051	12331.2	1.01495	12330.9	1.04213
12330.8	1.04531	12330.5	1.03976	12330.5	1.02199	12330.5	1.02015	12330.5	1.05201	12342.8	0.992072	12330.5	1.04764	12330	1.05171	12330.4	1.03768	12330.3	1.05348	12330	1.05225	12330.2	1.05456	12331.4	1.01361	12331.1	1.03724
12331	1.04358	12330.6	1.03872	12330.6	1.02048	12330.6	1.02045	12330.6	1.05141	12343	0.994836	12330.6	1.05246	12330.2	1.04926	12330.6	1.03672	12330.5	1.05087	12330.2	1.04854	12330.4	1.05081	12331.6	1.01661	12331.3	1.03713
12331.2	1.04365	12330.8	1.04435	12330.8	1.02172	12330.8	1.0204	12330.8	1.05091	12343.2	0.993652	12330.8	1.05064	12330.4	1.04749	12330.7	1.03851	12330.6	1.05181	12330.4	1.0657	12330.6	1.04795	12331.8	1.01673	12331.5	1.03809
12331.4	1.04432	12331	1.04074	12331	1.02447	12331	1.01869	12331	1.05024	12343.4	0.992263	12331	1.05015	12330.5	1.04587	12330.9	1.03544	12330.8	1.04739	12330.6	1.06466	12330.8	1.04592	12332	1.01348	12331.7	1.03197
12331.6	1.04325	12331.2	1.03423	12331.2	1.0213	12331.2	1.01776	12331.2	1.04647	12343.6	0.994765	12331.2	1.04084	12330.7	1.04845	12331.1	1.03509	12331	1.05115	12330.8	1.05119	12331	1.05065	12332.2	1.01461	12331.9	1.02849
12331.8	1.03921	12331.4	1.03619	12331.4	1.01833	12331.4	1.01719	12331.4	1.04663	12343.8	0.994509	12331.4	1.04911	12330.9	1.04679	12331.3	1.03621	12331.2	1.04689	12331	1.05907	12331.1	1.04551	12332.4	1.00912	12332.1	1.03444
12332	1.04222	12331.6	1.03716	12331.6	1.02253	12331.6	1.01764	12331.6	1.04622	12344	1.00175	12331.6	1.04088	12331.1	1.04505	12331.5	1.03765	12331.4	1.04748	12331.1	1.05386	12331.4	1.04419	12332.6	1.0119	12332.3	1.02654
12332.2	1.04229	12331.8	1.03811	12331.8	1.01705	12331.8	1.01846	12331.8	1.04561	12344.2	0.999945	12331.8	1.03801	12331.3	1.04659	12331.7	1.03441	12331.6	1.04414	12331.4	1.03974	12331.6	1.04791	12332.8	1.01453	12332.5	1.03395
12332.4	1.04295	12332	1.03735	12332	1.01972	12332	1.01911	12332	1.04347	12344.4	0.995309	12332	1.03837	12331.5	1.03915	12331.9	1.03624	12331.8	1.04446	12331.6	1.04612	12331.8	1.0431	12333	1.01405	12332.7	1.02758
12332.6	1.04103	12332.2	1.0367	12332.2	1.02274	12332.2	1.01894	12332.2	1.0429	12344.6	1.00085	12332.2	1.04022	12331.7	1.04165	12332.1	1.03726	12332	1.0424	12331.8	1.04245	12332	1.03709	12333.2	1.00809	12332.8	1.02588
12332.8	1.03934	12332.4	1.03533	12332.4	1.01599	12332.4	1.0165	12332.4	1.04438	12344.8	0.993373	12332.4	1.04367	12331.9	1.04117	12332.3	1.03358	12332.2	1.0419	12332	1.04345	12332.1	1.04419	12333.4	1.01484	12333	1.0285
12333	1.0383	12332.6	1.03385	12332.6	1.02241	12332.6	1.01573	12332.6	1.04197	12345	0.992089	12332.6	1.04074	12332.1	1.03734	12332.5	1.02995	12332.4	1.03893	12332.1	1.03778	12332.4	1.04075	12333.6	1.01226	12333.2	1.02878
12333.2	1.02942	12332.8	1.03453	12332.8	1.01711	12332.8	1.01644	12332.8	1.03955	12345.2	0.992211	12332.8	1.03755	12332.3	1.03742	12332.7	1.03048	12332.6	1.04049	12332.4	1.02671	12332.5	1.03575	12333.8	1.00529	12333.4	1.02269
12333.4	1.03337	12333	1.02886	12333	1.01829	12333	1.0174	12333	1.03843	12345.4	0.994944	12333	1.03751	12332.5	1.03875	12332.9	1.03366	12332.8	1.03977	12332.5	1.03319	12332.7	1.03521	12334	1.01159	12333.6	1.02433
12333.6	1.02925	12333.2	1.0293	12333.2	1.01548	12333.2	1.01473	12333.2	1.03474	12345.6	0.99367	12333.2	1.03501	12332.7	1.04474	12333.1	1.03151	12333	1.03286	12332.7	1.0279	12333	1.03094	12334.2	1.01529	12333.8	1.02509
12333.8	1.0293	12333.4	1.02897	12333.4	1.01813	12333.4	1.01504	12333.4	1.03484	12345.9	0.995385	12333.4	1.03225	12332.9	1.03216	12333.3	1.02994	12333.3	1.03612	12333	1.029	12333.2	1.02719	12334.4	1.0092	12334	1.02381
12334	1.03144	12333.6	1.02899	12333.6	1.01899	12333.6	1.01559	12333.6	1.03452	12346	0.993639	12333.6	1.03635	12333.1	1.03496	12333.5	1.02919	12333.5	1.03034	12333.2	1.03875	12333.4	1.02659	12334.6	1.00934	12334.2	1.0232
12334.2	1.02952	12333.8	1.02404	12333.8	1.01663	12333.8	1.01447	12333.8	1.03269	12346.3	0.992259	12333.8	1.03127	12333.4	1.03549	12333.7	1.02914	12333.7	1.03282	12333.4	1.04011	12333.6	1.03484	12334.8	1.01118	12334.4	1.02718
12334.4	1.03111	12334	1.02669	12334	1.01317	12334	1.01497	12334	1.03071	12346.5	0.997559	12334	1.03094	12333.5	1.03756	12333.9	1.02565	12333.9	1.02976	12333.6	1.04087	12333.8	1.03237	12335	1.01014	12334.6	1.01839
12334.6	1.02865	12334.2	1.02591	12334.2	1.01641	12334.2	1.01724	12334.2	1.03094	12346.7	0.990698	12334.2	1.02916	12333.8	1.03532	12334.1	1.02539	12334	1.03156	12333.8	1.03433	12334	1.0286	12335.2	1.01129	12334.8	1.02131
12334.8	1.02474	12334.4	1.02545	12334.4	1.01259	12334.4	1.01618	12334.4	1.03117	12346.9	0.989392	12334.4	1.02698	12333.9	1.02933	12334.3	1.02794	12334.2	1.02792	12334	1.0321	12334.1	1.02884	12335.4	1.0075	12335	1.01843
12335	1.02698	12334.6	1.02169	12334.6	1.01507	12334.6	1.01931	12334.6	1.02987	12347.1	0.991364	12334.6	1.02799	12334.1	1.03421	12334.5	1.02188	12334.4	1.02619	12334.2	1.01909	12334.3	1.03	12335.6	1.00839	12335.2	1.01496
12335.2	1.02562	12334.8	1.0212	12334.8	1.01078	12334.8	1.01781	12334.8	1.02686	12347.3	0.994896	12334.8	1.0238	12334.3	1.03549	12334.7	1.02079	12334.6	1.02732	12334.4	1.01348	12334.5	1.0275	12335.8	1.01228	12335.4	1.01663
12335.4	1.02491	12335	1.02247	12335	1.01219	12335	1.01457	12335	1.0264	12347.5	0.993192	12335	1.02566	12334.5	1.03366	12334.9	1.02219	12334.8	1.02753	12334.6	1.01968	12334.8	1.02518	12336	1.01087	12335.6	1.01732
12335.6	1.02561	12335.2	1.02288	12335.2	1.01455	12335.2	1.01475	12335.2	1.0237	12347.7	0.996407	12335.2	1.02692	12334.7	1.03177	12335.1	1.01971	12335	1.02363	12334.8	1.02129	12335	1.03265	12336.2	1.01248	12335.8	1.0148
12335.8	1.02445	12335.4	1.02101	12335.4	1.01128	12335.4	1.01587	12335.4	1.02194	12347.9	0.995479	12335.4	1.02588	12334.9	1.02764	12335.3	1.01672	12335.2	1.02315	12335	1.03431	12335.2	1.02331	12336.4	1.00819	12336	1.01386
12336	1.01953	12335.6	1.01936	12335.6	1.01285	12335.6	1.01419	12335.6	1.02447	12348.1	0.993471	12335.6	1.02257	12335.1	1.02822	12335.5	1.01729	12335.4	1.02368	12335.2	1.03763	12335.4	1.02247	12336.7	1.00255	12336.2	1.01287
12336.2	1.0192	12335.8	1.01875	12335.8	1.00973	12335.8	1.01413	12335.8	1.0231	12348.3	0.993981	12335.8	1.02148	12335.3	1.0258	12335.7	1.01701	12335.6	1.02129	12335.4	1.0346	12335.6	1.01994	12336.9	1.0051	12336.4	1.01164
12336.4	1.01631	12336	1.01628	12336	1.00931	12336	1.01623	12336	1.021	12348.5	0.993841	12336	1.02037	12335.5	1.02813	12335.9	1.01808	12335.9	1.02103	12335.6	1.01833	12335.8	1.02057	12337.1	1.00816	12336.5	1.00685
12336.7	1.01476	12336.2	1.01774	12336.2	1.00895	12336.2	1.01306	12336.2	1.01953	12348.7	0.992751	12336.3	1.01887	12335.7	1.02971	12336.1	1.01516	12336	1.02136	12335.8	1.02138	12336	1.0232	12337.3	1.00769	12336.8	1.01241
12336.9	1.01757	12336.4	1.02035	12336.4	1.01028	12336.4	1.01303	12336.4	1.01831	12348.9	0.994427	12336.5	1.01934	12335.9	1.02189	12336.3	1.01391	12336.3	1.01894	12336	1.02148	12336.2	1.01805	12337.5	1.0091	12337	1.01244
12337.1	1.01625	12336.7	1.01314	12336.7	1.0078	12336.7	1.01354	12336.7	1.01835	12349.1	0.993274	12336.7	1.02125	12336.1	1.01888	12336.6	1.01277	12336.5	1.0187	12336.2	1.02214	12336.4	1.01562	12337.7	1.01088	12337.2	1.0041
12337.3	1.01416	12336.9	1.01032	12336.9	1.01091	12336.9	1.01411	12336.9	1.01682	12349.4	0.994068	12336.9	1.02261	12336.4	1.01937	12336.8	1.01317	12336.7	1.01688	12336.4	1.01717	12336.6	1.0167	12337.9	1.01578	12337.4	1.00905
12337.5	1.01401	12337.1	1.01289	12337.1	1.01332	12337.1	1.01199	12337.1	1.01734	12349.6	0.996637	12337.1	1.01827	12336.6	1.01901	12337	1.01341	12336.9	1.01587	12336.6	1.01567	12336.9	1.01074	12338.1	1.01254	12337.6	1.00921
12337.7	1.00449	12337.3	1.01258	12337.3	1.00995	12337.3	1.01269	12337.3	1.0158	12349.8	0.996576	12337.4	1.01139	12336.8	1.01786	12337.2	1.01554	12337.1	1.01257	12336.9	1.01121	12337.1	1.01029	12338.4	1.00935	12337.8	1.00493
12337.9	1.01078	12337.5	1.01103	12337.5	1.0077	12337.5	1.01374	12337.5	1.01413	12350	0.998349	12337.5	1.0147	12337	1.01779	12337.4	1.01173	12337.4	1.0129	12337.1	1.00803	12337.3	1.01691	12338.6	1.00735	12338	1.0059
12338.2	1.01066	12337.7	1.01044	12337.7	1.00771	12337.7	1.01282	12337.7	1.01422	12350.2	0.991966	12337.8	1.01214	12337.2	1.01971	12337.6	1.01443	12337.6	1.01305	12337.3	0.994605	12337.5	1.01823	12338.8	1.00942	12338.2	1.00679
12338.4	1.01081	12337.9	1.01201	12337.9	1.0079	12337.9	1.0144	12337.9	1.01158	12350.5	0.993441	12338	1.01106	12337.5	1.01738	12337.8	1.0135	12337.8	1.01461	12337.5	1.00184	12337.7	1.01545	12339	1.0061	12338.4	1.00175
12338.6	1.00991	12338.2	1.00747	12338.2	1.00809	12338.2	1.01079	12338.2	1.00881	12350.7	0.99579	12338.2	1.01212	12337.7	1.01386	12338.1	1.00859	12338	1.01036	12337.7	1.00821	12337.9	1.00896	12339.2	1.0051	12338.6	1.00498
12338.8	1.00712	12338.4	1.00693	12338.4	1.00425	12338.4	1.01032	12338.4	1.00686	12350.9	0.998964	12338.4	1.01219	12337.9	1.01489	12338.3	1.00877	12338.2	1.00961	12337.9	1.01878	12338.1	1.00929	12339.4	1.01012	12338.8	1.00751
12339	1.00519	12338.6	1.00768	12338.6	1.00563	12338.6	1.01102	12338.6	1.0099	12351.1	0.995831	12338.6	1.00844	12338.1	1.01081	12338.5	1.00797	12338.4	1.00384	12338.1	1.00729	12338.3	1.01357	12339.6	1.00801	12339.1	1.00483
12339.2	1.00095	12338.8	1.0061	12338.8	1.00355	12338.8	1.01053	12338.8	1.00822	12351.4	0.993899	12338.8	1.00496	12338.3	1.01212	12338.8	1.00746	12338.6	1.00954	12338.4	0.997337	12338.5	1.01335	12339.8	1.00768	12339.2	1.00285
12339.4	1.00706	12339	1.00387	12339	1.00578	12339	1.00998	12339	1.00651	12351.5	0.993492	12339	1.00915	12338.5	1.01191	12338.9	1.00323	12338.9	1.01189	12338.6	1.01383	12338.8	1.00655	12340.1	1.00461	12339.5	1.00038
12339.6	1.00157	12339.2	1.00266	12339.2	1.00398	12339.2	1.01004	12339.2	1.00602	12351.8	0.99315	12339.3	1.00777	12338.7	1.00757	12339.1	1.00474	12339	1.00472	12338.8	1.0071	12339	1.00528	12340.3	1.00531	12339.6	1.00465
12339.8	1.00381	12339.4	1.00537	12339.4	1.00723	12339.4	1.00982	12339.4	1.00422	12352	0.993943	12339.5	1.00448	12339	1.01226	12339.3	1.00605	12339.2	1.00759	12339	0.999304	12339.2	1.00055	12340.5	1.00015	12339.8	0.999804
12340.1	1.00522	12339.6	1.00198	12339.6	1.00866	12339.6	1.00955	12339.6	1.00288	12352.2	0.993706	12339.7	1.00427	12339.2	1.00655	12339.6	1.00221	12339.4	1.00728	12339.2	1.00788	12339.4	1.00843	12340.7	0.997776	12340	0.99309
12340.3	1.00497	12339.8	1.00648	12339.8	1.00195	12339.8	1.00823	12339.8	1.00265	12352.4	0.993847	12339.9	1.00904	12339.4	1.01167	12339.8	1.00461	12339.6	1.00591	12339.4	1.00581	12339.6	1.01167	12340.9	1.00335	12340.2	0.993877
12340.5	1.00372	12340.1	0.999203	12340.1	1.00102	12340.1	1.01012	12340.1	1.003	12352.6	0.998387	12340.1	1.00559	12339.6	1.00809	12340	1.00141	12339.9	1.00126	12339.6	1.00714	12339.8	1.00556	12341.1	1.00157	12340.5	0.997901
12340.7	1.00377	12340.3	1.00185	12340.3	1.0021	12340.3	1.00749	12340.3	1.00196	12352.8	0.999524	12340.3	1.00248	12339.8	1.01109	12340.2	1.00433	12340.1	1.00054	12339.8	1.00616	12340	1.00638	12341.4	1.00397	12340.7	0.99552
12340.9	1.00188	12340.5	1.00246	12340.5	1.00078	12340.5	1.00754	12340.5	1.00396	12353	0.997268	12340.5	1.0008	12340	1.00604	12340.4	0.998934	12340.3	1.00069	12340	1.00604	12340.3	1.00533	12341.6	1.00277	12340.9	0.999603
12341.1	0.998018	12340.7	0.998844	12340.7	1.00175	12340.7	1.00571	12340.7	1.00181	12353.2	1.00254	12340.8	1.00144	12340.2	1.01125	12340.7	0.997942	12340.5	1.00198	12340.3	1.0136	12340.5	1.0043	12341.8	1.00353	12341.1	0.994463
12341.3	0.997076	12340.9	0.997906	12340.9	1.00321	12340.9	1.00568	12340.9	1.0033	12353.4	0.996005	12341	1.00581	12340.5	1.00826	12340.9	0.999778	12340.8	1.00131	12340.5	0.997033	12340.7	1.00131	12342	1.00164	12341.3	0.993077
12341.6	0.999459	12341.1	0.999796	12341.1	0.998905	12341.1	1.00537	12341.1	1.00187	12353.7	0.996737	12341.2	0.998578	12340.7	1.0083	12341	0.997839	12341	1.00148	12340.7	0.995563	12340.9	0.994936	12342.2	0.998305	12341.5	0.9966
12341.8	1.00018	12341.3	0.996118	12341.3	0.998342	12341.3	1.00481	12341.3	0.998597	12353.9	1.00646	12341.4	0.99652	12340.9	1.00634	12341.2	0.999102	12341.2	0.996677	12340.9	1.01113	12341.1	0.995856	12342.4	0.99996	12341.7	0.991834
12342	0.998492	12341.6	0.99692	12341.6	0.996877	12341.6	1.00469	12341.6	0.997427	12354.1	1.00073	12341.6	1.00161	12341.1	1.00203	12341.5	1.00191	12341.4	0.997074	12341.1	0.992788	12341.3	0.997352	12342.6	1.00121	12341.9	0.997481
12342.2	0.999241	12341.8	0.997004	12341.8	1.00328	12341.8	1.00562	12341.8	0.998382	12354.3	1.00509	12341.8	1.00698	12341.3	1.01065	12341.7	0.999659	12341.6	0.995371	12341.3	0.987007	12341.5	1.00268	12342.8	1.00497	12342.1	0.993661
12342.4	1.00153	12342	0.995209	12342	1.00289	12342	1.00842	12342	0.997968	12354.5	0.998984	12342	0.9986	12341.5	1.00201	12341.9	0.996745	12341.8	0.996076	12341.5	1.0022	12341.8	1.00171	12343	0.999852	12342.3	0.988878
12342.6	0.998972	12342.2	0.997416	12342.2	0.998711	12342.2	1.00364	12342.2	1.00018	12354.8	1.0005	12342.2	0.995753	12341.7	1.00019	12342.1	0.997482	12342	0.997507	12341.8	1.00766	12342	0.999832	12343.2	0.998274	12342.5	0.990255
12342.8	0.999192	12342.4	0.996701	12342.4	0.998532	12342.4	1.00601	12342.4	0.997442	12354.9	0.996651	12342.5	1.00215	12342	0.999261	12342.3	1.00301	12342.3	0.998115	12342	0.991749	12342.2	1.00453	12343.4	1.00038	12342.7	0.994461
12343	0.990552	12342.6	0.99291	12342.6	0.997573	12342.6	1.00322	12342.6	0.995707	12355.2	0.999155	12342.7	0.999396	12342.2	1.00361	12342.6	0.999886	12342.4	0.997995	12342.2	0.997165	12342.4	1.00337	12343.6	0.997367	12343	0.991412
12343.2	0.99042	12342.8	0.991576	12342.8	0.998793	12342.8	1.00436	12342.8	0.995527	12355.4	0.999949	12342.9	0.994414	12342.4	0.999129	12342.8	1.00119	12342.7	0.995921	12342.4	1.00913	12342.6	0.99774	12343.8	1.00635	12343.1	0.987216
12343.4	0.996474	12343	0.988963	12343	1.00217	12343	1.00239	12343	0.994522	12355.6	1.00419	12343.1	0.999784	12342.6	1.00243	12343	0.995633	12342.9	0.991104	12342.6	0.999225	12342.8	0.997186	12344	1.00688	12343.3	0.98957
12343.6	0.993949	12343.2	0.992716	12343.2	1.00145	12343.2	1.0028	12343.2	0.994008	12355.8	1.00356	12343.2	0.997442	12342.8	0.995387	12343.2	0.999698	12343	0.990538	12342.8	0.996906	12343	0.998842	12344.2	1.00028	12343.5	0.996486
12343.8	0.989692	12343.4	0.99408	12343.4	0.994958	12343.4	1.00181	12343.4	0.995106	12356	1.00556	12343.5	0.994317	12343	1.00195	12343.4	0.997469	12343.2	0.994896	12343	0.995467	12343.2	0.999044	12344.4	1.00811	12343.7	0.987917
12344	0.99372	12343.6	0.990902	12343.6	1.00141	12343.6	0.999802	12343.6	0.993069	12356.2	0.997667	12343.7	0.999186	12343.1	1.00053	12343.6	1.00187	12343.4	0.995027	12343.2	0.985781	12343.4	0.994731	12344.6	1.00457	12343.9	0.988998
12344.2	0.993395	12343.8	0.995346	12343.8	1.00083	12343.8	1.00618	12343.8	0.992844	12356.4	0.99857	12343.9	0.997627	12343.4	0.999115	12343.8	0.999183	12343.6	0.993502	12343.4	1.00154	12343.6	0.997675	12344.8	0.994888	12344.1	0.993391
12344.4	0.995503	12344	0.993319	12344	0.998306	12344	1.00226	12344	0.9948	12356.6	0.999806	12344.1	0.999402	12343.6	0.995236	12344	0.995214	12343.9	0.994895	12343.6	1.00904	12343.8	0.99076	12345	0.998817	12344.3	0.984364
12344.6	0.993796	12344.2	0.992494	12344.2	1.00144	12344.2	1.00194	12344.2	0.993401	12356.8	0.99881	12344.3	0.995245	12343.8	0.999651	12344.2	0.995616	12344	0.993806	12343.8	1.00228	12344	0.991435	12345.2	0.998749	12344.5	0.98361
12344.8	0.991534	12344.4	0.993967	12344.4	0.994973	12344.4	1.00568	12344.4	0.992392	12357	1.00128	12344.5	0.995276	12344	1.00551	12344.4	0.998078	12344.2	0.993017	12344	1.0015	12344.2	0.991712	12345.5	0.998689	12344.7	0.989614
12345	0.995495	12344.6	0.994924	12344.6	0.996279	12344.6	1.00239	12344.6	0.992779	12357.1	1.00048	12344.7	0.993538	12344.2	0.998449	12344.6	0.994479	12344.5	0.988847	12344.2	0.993739	12344.4	0.989559	12345.7	0.998746	12344.9	0.991292
12345.2	0.99599	12344.8	0.995953	12344.8	0.998842	12344.8	1.00106	12344.8	0.99438	12357.3	0.997332	12344.9	0.990397	12344.4	1.00184	12344.7	0.99675	12344.6	0.991469	12344.4	0.996381	12344.6	0.996957	12345.9	1.00019	12345	0.991492
12345.5	0.994385	12345	0.994648	12345	0.997862	12345	1.00152	12345	0.992965	12357.5	1.00085	12345.1	0.991432	12344.6	0.996213	12345	0.999881	12344.8	0.995607	12344.6	0.985775	12344.8	0.997084	12346.1	1.00442	12345.2	0.983203
12345.7	0.997689	12345.2	0.989278	12345.2	0.999001	12345.2	0.999918	12345.2	0.991733	12357.8	0.99857	12345.3	0.996497	12344.8	0.996812	12345.2	0.998977	12345	0.991814	12344.8	0.97992	12345	0.992745	12346.3	0.997148	12345.4	0.992008
12345.9	0.992168	12345.5	0.991521	12345.5	1.00155	12345.5	0.999048	12345.5	0.99358	12358	0.998627	12345.5	0.997899	12345	0.994402	12345.4	0.99393	12345.3	0.99102	12345	0.99893	12345.2	0.989048	12346.5	0.996413	12345.6	0.985658
12346.1	0.99481	12345.7	0.990888	12345.7	0.997048	12345.7	1.00205	12345.7	0.99388	12358.1	1.00177	12345.7	0.997365	12345.2	0.99829	12345.6	0.995492	12345.5	0.992528	12345.2	0.993394	12345.4	0.992115	12346.7	0.998056	12345.8	0.986646
12346.3	0.994765	12345.9	0.99393	12345.9	0.993007	12345.9	1.00245	12345.9	0.991528	12358.4	1.00789	12345.9	0.995795	12345.4	0.99615	12345.8	0.996993	12345.7	0.989895	12345.4	1.00133	12345.6	0.993519	12346.9	0.999885	12346	0.982829
12346.5	0.990032	12346.1	0.989958	12346.1	1.00138	12346.1	0.999547	12346.1	0.993701	12358.6	1.00399	12346.1	0.992863	12345.6	0.998563	12346	0.993289	12345.9	0.991419	12345.6	0.993212	12345.9	0.995053	12347.1	1.0057	12346.2	0.986045
12346.7	0.990879	12346.3	0.9917	12346.3	0.996738	12346.3	1.0001	12346.3	0.993835	12358.8	1.0031	12346.3	0.995593	12345.8	0.997745	12346.2	0.991173	12346.1	0.99331	12345.8	0.995518	12346.1	1.00015	12347.3	1.00066	12346.4	0.98976
12346.9	0.983587	12346.5	0.989247	12346.5	0.995164	12346.5	1.00161	12346.5	0.990276	12359	0.997073	12346.5	0.992148	12346	0.994169	12346.4	0.994354	12346.3	0.991255	12346.1	0.997253	12346.3	0.999438	12347.5	1.00456	12346.6	0.987899
12347.1	0.991362	12346.7	0.990618	12346.7	0.998879	12346.7	1.00245	12346.7	0.98951	12359.2	1.00237	12346.7	0.989126	12346.3	0.994455	12346.6	0.992726	12346.5	0.989805	12346.3	0.99617	12346.5	0.991104	12347.7	1.00292	12346.8	0.982582
12347.4	0.990021	12346.9	0.992386	12346.9	1.00163	12346.9	1.00131	12346.9	0.994936	12359.4	1.00362	12347	0.99022	12346.5	0.995706	12346.8	0.995527	12346.7	0.988491	12346.5	0.996026	12346.7	0.997401	12347.9	1.00284	12347	0.988721
12347.6	0.99386	12347.1	0.992174	12347.1	0.994214	12347.1	1.00085	12347.1	0.994506	12359.5	1.00081	12347.2	0.989742	12346.6	0.99914	12347.1	0.992226	12346.9	0.994322	12346.7	0.980162	12346.9	0.995428	12348.1	0.9958	12347.2	0.994953
12347.8	0.994521	12347.4	0.989919	12347.4	0.994749	12347.4	1.00096	12347.4	0.993871			12347.4	0.992539	12346.9	1.00038	12347.3	0.992923	12347.2	0.99139	12346.9	0.994461	12347.1	0.994668	12348.3	0.995612	12347.4	0.985021
12348	0.990178	12347.6	0.991123	12347.6	0.999387	12347.6	1.00105	12347.6	0.994004			12347.6	0.993102	12347.1	0.999761	12347.5	0.990576	12347.4	0.989155	12347.1	0.998535	12347.3	0.991709	12348.5	0.99836	12347.6	0.987811
12348.1	0.993413	12347.8	0.991883	12347.8	0.999369	12347.8	1.00069	12347.8	0.995954			12347.8	0.990859	12347.3	0.997468	12347.7	0.988426	12347.6	0.991512	12347.3	0.99014	12347.5	0.994412	12348.8	0.999157	12347.8	0.987009
12348.3	0.993737	12348	0.99427	12348	0.996136	12348	1.00173	12348	0.99075			12348	0.997382	12347.5	0.997967	12347.9	0.998376	12347.8	0.989756	12347.5	0.983047	12347.7	1.00069	12349	1.00174	12348	0.996341
12348.5	0.99337	12348.1	0.990108	12348.1	0.995085	12348.1	0.998742	12348.1	0.991628			12348.2	0.997034	12347.7	0.997602	12348.1	0.99299	12347.9	0.99102	12347.7	0.987483	12347.9	0.996122	12349.2	0.998796	12348.2	0.981555
12348.8	0.986716	12348.3	0.993947	12348.3	0.994987	12348.3	1.00117	12348.3	0.99364			12348.4	0.992994	12347.9	0.994337	12348.3	1.00116	12348.1	0.99072	12347.9	0.997537	12348.1	0.99334	12349.4	1.0041	12348.4	0.990155
12349	0.992944	12348.5	0.996314	12348.5	0.997594	12348.5	0.99884	12348.5	0.996589			12348.6	0.992778	12348.1	0.999052	12348.5	0.996274	12348.4	0.993541	12348.1	0.984276	12348.3	0.996684	12349.6	1.00126	12348.6	0.989976
12349.2	0.998783	12348.8	0.990083	12348.8	1.00314	12348.8	0.997691	12348.8	0.994442			12348.8	0.996145	12348.3	0.994944	12348.7	0.990517	12348.5	0.99345	12348.3	0.991808	12348.5	0.986573	12349.9	1.00375	12348.8	0.989152
12349.4	0.991908	12349	0.992208	12349	0.999005	12349	0.998421	12349	0.994805			12349	0.995293	12348.5	0.997094	12348.9	0.992995	12348.8	0.991958	12348.5	0.993669	12348.7	0.988832	12350	1.00567	12349	0.989746
12349.6	0.98855	12349.2	0.989659	12349.2	0.997193	12349.2	0.997484	12349.2	0.991545			12349.3	0.998659	12348.7	0.990664	12349.1	0.994068	12349	0.992278	12348.7	0.981203	12349	0.982637	12350.3	0.99651	12349.2	0.983282
12349.9	0.994537	12349.4	0.990281	12349.4	1.0028	12349.4	0.999405	12349.4	0.990006			12349.5	0.997305	12348.9	0.992556	12349.3	0.994911	12349.2	0.993418	12349	0.987556	12349.2	0.993262	12350.5	0.999797	12349.4	0.986294
12350.1	0.997265	12349.6	0.992303	12349.6	1.00352	12349.6	1.00069	12349.6	0.99303			12349.7	0.996145	12349.1	1.0002	12349.5	0.99943	12349.4	0.989524	12349.2	0.990236	12349.4	0.990281	12350.7	0.997312	12349.5	0.986443
12350.3	0.990179	12349.9	0.992792	12349.9	0.996676	12349.9	1.0004	12349.9	0.992378			12349.9	0.995346	12349.4	0.996373	12349.7	0.995639	12349.6	0.989974	12349.4	0.983734	12349.6	0.989799	12351	0.998952	12349.7	0.988818
12350.5	0.999182	12350.1	0.993846	12350.1	0.998634	12350.1	0.997478	12350.1	0.995099			12350.1	0.99622	12349.6	0.988989	12350	0.99321	12349.9	0.994299	12349.6	0.988786	12349.8	0.989018	12351.2	1.00269	12349.9	0.977364
12350.7	0.997344	12350.3	0.994197	12350.3	0.99924	12350.3	1.00589	12350.3	0.996625			12350.3	0.994606	12349.8	0.99739	12350.1	1.00036	12350.1	0.993788	12349.8	1.00952	12350	0.996634	12351.4	0.992984	12350.1	0.991123
12351	0.995685	12350.5	0.993167	12350.5	0.99638	12350.5	1.00153	12350.5	0.994175			12350.5	1.00162	12350	0.994992	12350.4	0.997383	12350.3	0.997351	12350	0.993326	12350.2	0.999267	12351.6	1.00081	12350.3	0.989563
12351.2	0.995897	12350.7	0.993434	12350.7	0.999565	12350.7	0.999737	12350.7	0.99192			12350.8	0.994977	12350.2	1.00131	12350.6	0.996693	12350.5	0.988896	12350.2	0.990124	12350.5	1.00129	12351.8	1.00036	12350.5	0.995807
12351.4	0.988808	12351	0.995377	12351	0.99731	12351	1.00227	12351	0.993708			12351	0.996437	12350.4	1.00355	12350.9	0.995283	12350.8	0.994228	12350.5	1.00162	12350.7	0.994645	12352	1.00288	12350.8	0.985252
12351.6	0.998012	12351.2	0.993283	12351.2	1.00067	12351.2	1.00469	12351.2	0.995376			12351.2	0.993769	12350.7	0.997207	12351.1	0.991692	12351	0.995438	12350.7	0.995486	12350.9	1.00003	12352.2	1.00217	12351	0.989734
12351.8	1.00041	12351.4	0.994169	12351.4	0.996166	12351.4	1.00176	12351.4	0.999809			12351.4	0.990673	12350.9	1.0005	12351.3	0.990222	12351.2	0.993954	12350.9	0.993744	12351.1	0.994826	12352.4	1.00572	12351.2	0.983776
12352	0.997476	12351.6	0.992073	12351.6	0.998068	12351.6	0.998762	12351.6	0.992144			12351.6	1.00217	12351.1	0.998455	12351.5	0.992648	12351.4	0.990471	12351.1	0.988414	12351.4	0.994851	12352.6	0.997085	12351.4	0.987047
12352.2	0.994139	12351.8	0.994929	12351.8	1.00303	12351.8	1.00182	12351.8	0.995913			12351.8	0.997202	12351.3	0.992904	12351.7	0.99402	12351.6	0.9907	12351.4	0.990895	12351.6	0.99147	12352.9	1.00606	12351.6	0.98872
12352.5	0.995672	12352	0.994099	12352	1.00128	12352	1.00022	12352	0.996112			12352	0.996718	12351.5	0.999125	12351.9	0.996466	12351.8	0.99204	12351.6	0.995289	12351.7	0.999144	12353.1	0.999707	12351.8	0.995769
12352.7	0.996961	12352.2	0.99006	12352.2	0.998654	12352.2	1.0005	12352.2	0.996547			12352.3	0.995308	12351.7	0.996957	12352.1	0.991143	12352	0.994242	12351.8	0.993461	12352	0.997454	12353.3	1.00689	12352	0.99239
12352.9	0.996613	12352.5	0.99475	12352.5	0.998378	12352.5	1.00037	12352.5	0.998294			12352.5	0.993813	12351.9	1.00457	12352.4	0.991006	12352.2	0.988813	12352	0.989287	12352.2	0.990972	12353.5	1.00437	12352.2	0.990385
12353.1	0.995427	12352.7	0.994578	12352.7	0.995974	12352.7	1.00093	12352.7	0.994394			12352.7	0.994999	12352.1	1.00074	12352.6	1.0018	12352.5	0.990953	12352.2	0.989017	12352.4	0.988788	12353.7	1.0013	12352.4	0.994287
12353.3	0.993058	12352.9	0.993066	12352.9	0.998088	12352.9	1.00412	12352.9	0.993115			12352.9	0.999929	12352.4	0.997514	12352.8	0.997746	12352.7	0.995075	12352.4	0.988768	12352.6	0.994147	12353.9	1.00265	12352.7	0.991491
12353.5	1.00151	12353.1	0.9941	12353.1	1.00078	12353.1	1.00177	12353.1	0.995812			12353.1	0.995681	12352.6	0.999289	12353	0.997981	12352.9	0.99761	12352.6	0.983261	12352.8	1.00276	12354.1	0.998941	12352.9	0.989796
12353.7	1.00072	12353.3	0.994396	12353.3	1.00057	12353.3	1.00267	12353.3	0.997406			12353.4	0.993542	12352.8	0.997563	12353.2	0.993016	12353.1	0.994595	12352.8	0.994966	12353.1	1.00186	12354.4	0.996667	12353	0.99601
12353.9	0.998714	12353.5	0.993324	12353.5	1.00027	12353.5	1.00088	12353.5	0.995658			12353.6	1.00125	12353	0.997244	12353.4	0.997027	12353.3	0.996545	12353.1	0.993569	12353.3	0.996217	12354.6	1.00267	12353.2	0.996396
12354.1	1.00166	12353.7	0.994989	12353.7	0.999144	12353.7	1.00256	12353.7	0.993239			12353.8	1.00393	12353.2	0.994298	12353.6	0.997164	12353.5	0.993168	12353.3	0.994262	12353.5	0.998668	12354.8	1.0041	12353.4	0.993427
12354.4	0.996588	12353.9	0.996721	12353.9	1.00206	12353.9	1.00229	12353.9	0.996181			12354	1.00481	12353.4	1.00424	12353.8	1.00173	12353.7	1.00213	12353.5	0.987289	12353.7	0.997863	12355	1.0038	12353.6	0.993025
12354.6	0.993905	12354.1	0.998393	12354.1	0.997983	12354.1	1.00136	12354.1	0.99891			12354.2	0.998454	12353.6	0.999981	12354	1.00296	12353.9	0.995416	12353.7	0.992544	12353.9	0.994892	12355.2	1.00404	12353.9	0.994524
12354.8	0.997018	12354.4	0.992869	12354.4	0.999063	12354.4	1.00351	12354.4	0.996884			12354.4	1.00099	12353.9	0.996681	12354.3	1.00262	12354.2	0.9945	12353.9	0.976514	12354.1	0.993257	12355.4	1.00128	12354.1	0.989737
12355	0.996325	12354.6	0.996653	12354.6	0.998797	12354.6	1.00108	12354.6	0.99605			12354.6	1.00131	12354.1	1.00556	12354.5	0.993578	12354.4	0.9944	12354.1	1.0096	12354.3	1.00399	12355.6	1.00399	12354.3	0.993486
12355.2	0.999488	12354.8	0.998409	12354.8	1.00364	12354.8	1.00284	12354.8	0.996262			12354.9	1.00244	12354.3	1.00174	12354.7	0.995569	12354.6	0.997307	12354.3	0.989742	12354.6	0.997735	12355.8	1.00642	12354.5	0.994269
12355.4	1.00027	12355	0.993179	12355	0.999217	12355	0.999325	12355	1.00005			12355.1	1.00132	12354.5	0.994715	12354.9	0.999002	12354.8	0.996575	12354.6	0.990376	12354.8	0.99415	12356	0.999318	12354.7	0.999035
12355.6	1.0045	12355.2	0.996206	12355.2	1.00304	12355.2	0.9989	12355.2	0.999875			12355.2	1.00293	12354.7	0.995921	12355.1	0.994951	12355	0.99677	12354.8	0.993653	12355	0.99712	12356.2	1.00127	12354.9	0.997994
12355.9	0.997844	12355.4	0.996869	12355.4	1.00189	12355.4	1.0011	12355.4	0.999294			12355.5	1.00711	12354.9	0.999595	12355.3	0.999787	12355.2	0.995899	12355	0.989958	12355.2	0.99806	12356.4	0.999061	12355.1	0.994862
12356	0.998146	12355.6	1.00043	12355.6	0.999847	12355.6	0.999641	12355.6	1.00157			12355.6	1.00385	12355.1	1.00169	12355.5	0.994903	12355.4	0.995763	12355.2	0.99193	12355.4	1.00674	12356.6	0.995949	12355.3	0.992247
12356.3	1.00426	12355.9	0.998048	12355.9	0.998524	12355.9	1.00072	12355.9	0.997201			12355.9	0.997633	12355.4	0.999794	12355.7	0.996411	12355.6	0.9935	12355.4	0.996461	12355.6	1.00517	12356.8	0.998372	12355.5	0.993432
12356.5	1.00066	12356	1.00044	12356	0.998788	12356	0.999938	12356	0.997866			12356.1	1.00519	12355.5	1.00005	12356	1.00236	12355.8	0.995557	12355.6	1.00562	12355.8	1.0011	12357	1.00259	12355.8	0.991947
12356.7	1.00123	12356.3	1.00095	12356.3	0.996709	12356.3	0.999969	12356.3	0.996224			12356.3	1.00155	12355.8	0.99749	12356.1	1.00202	12356	1.00014	12355.8	1.01336	12356	1.00025	12357.2	1.0069	12356	0.999356
12356.9	1.0027	12356.5	0.999564	12356.5	1.00134	12356.5	1.00034	12356.5	1.00385			12356.5	1.00245	12356	1.0018	12356.4	1.00041	12356.2	0.99476	12356	1.00549	12356.2	0.997183	12357.4	1.00974	12356.2	0.999052
12357	0.997658	12356.7	0.997262	12356.7	1.00097	12356.7	0.999519	12356.7	0.998733			12356.7	0.999636	12356.2	1.00798	12356.5	1.00038	12356.4	0.996493	12356.2	0.997743	12356.4	1.0048	12357.6	0.998712	12356.4	0.99759
12357.2	1.00023	12356.9	0.996773	12356.9	1.005	12356.9	0.999361	12356.9	1.00448			12356.9	1.00305	12356.4	1.00448	12356.7	0.99942	12356.6	0.996251	12356.4	0.987035	12356.6	1.00434	12357.8	1.0086	12356.6	0.996958
12357.4	1.00133	12357	1.00107	12357	1.00092	12357	1.00008	12357	1.00284			12357	0.996073	12356.6	1.00843	12356.9	0.999647	12356.8	1.00191	12356.6	1.01117	12356.8	1.00609	12358	1.00399	12356.8	0.998424
12357.6	0.999805	12357.2	0.999581	12357.2	0.999542	12357.2	0.999724	12357.2	1.00049			12357.2	1.00179	12356.8	1.00103	12357.1	0.995766	12357	0.999285	12356.8	0.99999	12357	1.00493	12358.2	0.999678	12357	1.00244
12357.8	1.00012	12357.4	0.999934	12357.4	1.00014	12357.4	1.00332	12357.4	1.00292			12357.4	1.00646	12356.9	1.00131	12357.3	0.998436	12357.2	1.00145	12357	0.987845	12357.1	1.00256	12358.4	0.997814	12357.2	0.998326
12358	1.00401	12357.6	0.998905	12357.6	0.999505	12357.6	0.999481	12357.6	1.00226			12357.6	1.00237	12357.1	0.999315	12357.5	1.00127	12357.4	1.00036	12357.2	0.992177	12357.4	0.997797	12358.6	0.997988	12357.4	1.00088
12358.2	1.00646	12357.8	1.00119	12357.8	0.999267	12357.8	1.00294	12357.8	1.00147			12357.9	0.99849	12357.3	1.00167	12357.7	0.999415	12357.6	1.00184	12357.4	0.986206	12357.5	0.998531	12358.8	1.00529	12357.6	1.00381
12358.4	1.00639	12358	1.00464	12358	1.00253	12358	1.00205	12358	0.998741			12358.1	0.995481	12357.5	1.00913	12357.9	0.999647	12357.8	1.00182	12357.6	1.00336	12357.8	1.00045	12359	1.00529	12357.8	1.00549
12358.6	1.00043	12358.2	1.00017	12358.2	1.00284	12358.2	1.00231	12358.2	1.0025			12358.3	1.00062	12357.7	1.00903	12358.1	1.00566	12358	0.999491	12357.8	0.990444	12358	0.993402	12359.2	1.00569	12358	0.99929
12358.8	1.00305	12358.4	0.997629	12358.4	1.00307	12358.4	1.00267	12358.4	1.00077			12358.5	1.00357	12357.9	0.999633	12358.3	1.00404	12358.2	1.00209	12358	1.00693	12358.2	1.00487			12358.2	0.999891
12359	1.00029	12358.6	1.0049	12358.6	1.0023	12358.6	0.996587	12358.6	1.00289			12358.7	1.00188	12358.1	1.00362	12358.5	1.004	12358.4	1.00365	12358.2	1.0023	12358.4	1.00229			12358.4	0.998054
12359.2	0.996818	12358.8	1.00209	12358.8	1.00304	12358.8	1.00149	12358.8	0.999147			12358.9	1.00072	12358.3	1.00599	12358.7	1.00479	12358.6	0.998601	12358.4	1.00304	12358.6	1.0028			12358.5	0.997086
		12359	0.999586	12359	1.00199	12359	1.00334	12359	1.00111			12359	0.997721	12358.5	1.00206	12358.9	1.00668	12358.8	0.999544	12358.6	1.01	12358.8	1.00858			12358.7	1.0043
		12359.2	1.0057	12359.2	1.00673	12359.2	1.0026	12359.2	0.999467			12359.3	1.00093	12358.7	1.00504	12359.1	1.00314	12359	1.00036	12358.8	0.994061	12359	1.00038			12358.9	1.00474
		12359.4	1.00909	12359.4	1.00152	12359.4	0.998832	12359.4	1.00364			12359.5	1.00642	12359	0.995404	12359.3	1.00268	12359.2	1.00047	12359	0.986225	12359.2	0.994073			12359.1	1.00318
				12359.6	1.00188			12359.6	1.00358					12359.2	0.996476	12359.4	1.00079	12359.4	1.00491	12359.2	1.00682	12359.4	1.0042			12359.2	1.00552
														12359.4	1.00444	12359.5	1.00163	12359.5	1.00116	12359.4	1.01605	12359.5	0.999789
														12359.5	1.00073			12359.5	1.00048	12359.5	0.994929
																				12359.5	0.994599
																				12359.5	1.01074
